# Supplementary material for: A novel three-component [5 + 1] heterocyclization leading to 2-azafluorenone synthesis and its polyfunctionalizations
Source: Royal Society of Chemistry journal article supplement (doi:10.1039/c3ob40371h), 2013-01-01
Supplement: c3ob40371h.pdf [file c3ob40371h.pdf]

Electronic Supplementary Material (ESI) for Organic & Biomolecular Chemistry  
This journal is © The Royal Society of Chemistry 2013

## Supporting Information for

# A novel three-component [5+1] heterocyclization leading to 2-azafluorenone synthesis and its polyfunctionalizations

Ying Li, Wei Fan, Hai-Wei Xu, Bo Jiang,\* Shu-Liang Wang, Shu-Jiang Tu\*

School of Chemistry and Chemical Engineering, and Jiangsu Key Laboratory of Green Synthetic Chemistry for Functional Materials, Jiangsu Normal University, Jiangsu, P.R. China.

E-mail: jiangchem@jsnu.edu.cn (B. Jiang); laotu@jsnu.edu.cn (S.-J. Tu)

### General

Microwave irradiation was carried out with initiator from Biotage Company, Sweden. Melting points were determined in open capillaries and were uncorrected. IR spectra were taken on a FT-IR-Tensor 27 spectrometer in KBr pellets and reported in  $\text{cm}^{-1}$ .  $^1\text{H}$  NMR spectra were measured on a Bruker DPX 400 MHz spectrometer in  $\text{DMSO}-d_6$  with chemical shift ( $\delta$ ) given in ppm relative to TMS as internal standard. HRMS (ESI) was determined by using microTOF-Q II HRMS/MS instrument (Bruker). X-Ray crystallographic analysis was performed with a Siemens SMART CCD and a Siemens P4 diffractometer.

Example for the synthesis of **4a**:

#### **3-((3-chlorophenyl)thio)-1-(4-methylbenzoyl)-9-oxo-9H-indeno[2,1-c]pyridine-4-carbonitrile (4a)**

Typically, 2,2-dihydroxy-1-*p*-tolylethanone (**1a**, 1 mmol, 0.166 g, 1.0 equiv.) was introduced in a 10-mL Initiator<sup>TM</sup> reaction vial, 3-chlorobenzenethiol (**2a**, 1.0 mmol, 0.144 g, 1.0 equiv.) and 2-(3-oxo-2,3-dihydro-1H-inden-1-ylidene)malononitrile (**3**, 1.0 mmol, 0.194 g, 1.0 equiv.) as well as acetic acid (1.0 mL) were then successively added. Subsequently, the reaction vial was closed and then pre-stirred for 10 second. The mixture was irradiated (Time: 28 min, Temperature: 120 °C; Absorption Level: High; Fixed Hold Time) until TLC (petroleum ether : acetone 3:1) revealed that conversion of the starting material **1a** was complete. The reaction mixture was then cooled to room temperature and then diluted with cold water (20 ml). The solid product was collected by Büchner filtration and was purified by flash column chromatography (silica gel, mixtures of petroleum ether / acetone, 7:1, v/v) to afford the desired pure 2-azafluorenonones **4a** as a green solid (mp: 190-191 °C)

Electronic Supplementary Material (ESI) for Organic & Biomolecular Chemistry  
This journal is © The Royal Society of Chemistry 2013

**3-((3-Chlorophenyl)thio)-1-(4-methylbenzoyl)-9-oxo-9H-indeno[2,1-c]pyridine-4-carbonitrile (4a)**

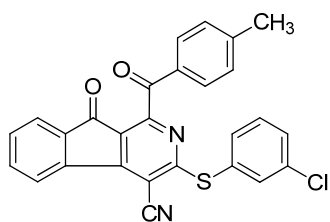

A green solid; mp: 190-191 °C

$^1\text{H}$  NMR (400 MHz, DMSO- $d_6$ )  $\delta$  8.25 (d,  $J$  = 7.6 Hz, 1H, ArH), 7.94-7.90 (m, 1H, ArH), 7.77 (s, 2H, ArH), 7.70 (d,  $J$  = 8.0 Hz, 3H, ArH), 7.56 (d,  $J$  = 7.6 Hz, 1H, ArH), 7.46-7.37 (m, 2H, ArH), 7.33 (d,  $J$  = 7.6 Hz, 2H, ArH), 2.39 (s, 3H, CH<sub>3</sub>).

$^{13}\text{C}$  NMR (100 MHz, DMSO- $d_6$ )  $\delta$  199.5, 190.3, 187.6, 166.8, 155.5, 154.1, 145.5, 138.5, 136.1, 134.0, 133.9, 133.5, 133.0, 131.5, 130.9, 129.9, 129.5, 129.0, 124.9, 123.6, 122.7, 114.0, 99.8, 94.0, 21.3.

IR (KBr,  $\nu$ ,  $\text{cm}^{-1}$ ): 3415, 2218, 1720, 1674, 1655, 1569, 1491, 1459, 1283, 1182, 1088, 941, 849.

HRMS (ESI):  $m/z$  calcd for C<sub>27</sub>H<sub>15</sub>ClN<sub>2</sub>NaSO<sub>2</sub>, 489.0435 [M+Na]<sup>+</sup>, found: 489.0461.

**3-((4-Bromophenyl)thio)-1-(4-methylbenzoyl)-9-oxo-9H-indeno[2,1-c]pyridine-4-carbonitrile (4b)**

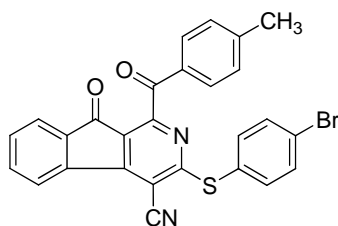

A green solid; mp: 194-194.3 °C

$^1\text{H}$  NMR (400 MHz, DMSO- $d_6$ )  $\delta$  8.24 (d,  $J$  = 7.6 Hz, 1H, ArH), 8.00 – 7.82 (m, 1H, ArH), 7.76-7.73 (m, 2H, ArH), 7.66 (d,  $J$  = 8.0 Hz, 2H, ArH), 7.58-7.52 (m, 4H, ArH), 7.32 (d,  $J$  = 8.0 Hz, 2H, ArH), 2.40 (s, 3H, CH<sub>3</sub>).

$^{13}\text{C}$  NMR (100 MHz, DMSO- $d_6$ )  $\delta$  190.2, 187.6, 167.1, 155.5, 154.0, 145.5, 138.5, 136.7, 136.1, 134.0, 133.9, 132.4, 131.5, 129.9, 129.4, 126.2, 124.9, 123.8, 123.6, 122.7, 114.0, 99.6, 21.3.

IR (KBr,  $\nu$ ,  $\text{cm}^{-1}$ ): 3439, 2221, 1725, 1673, 1602, 1560, 1472, 1454, 1386, 1364, 1286, 1237, 1182, 1118, 1086, 1007, 933, 821, 750, 693.

HRMS (ESI):  $m/z$  calcd for C<sub>27</sub>H<sub>15</sub>BrN<sub>2</sub>NaSO<sub>2</sub>, 534.9912 [M+Na]<sup>+</sup>, found: 534.9924.

**1-(4-Methylbenzoyl)-9-oxo-3-(phenylthio)-9H-indeno[2,1-c]pyridine-4-carbonitrile (4c)**

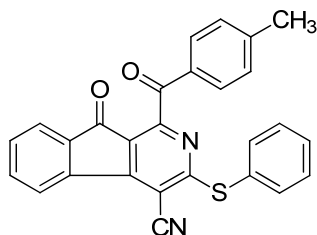

A pale yellow solid, mp: 200-201 °C

$^1\text{H}$  NMR (400 MHz, DMSO- $d_6$ )  $\delta$  8.23 (d,  $J$  = 7.6 Hz, 1H, ArH), 7.95 – 7.84 (m, 1H, ArH), 7.74-7.73 (m, 2H, ArH), 7.65 (d,  $J$  = 8.0 Hz, 2H, ArH), 7.61 – 7.53 (m, 2H, ArH), 7.40 – 7.28 (m,

Electronic Supplementary Material (ESI) for Organic & Biomolecular Chemistry  
This journal is © The Royal Society of Chemistry 2013

5H, ArH), 2.37 (s, 3H, CH<sub>3</sub>).

IR (KBr,  $\nu$ , cm<sup>-1</sup>): 3440, 2217, 1719, 1667, 1603, 1569, 1442, 1369, 1284, 1242, 1180, 1120, 1022, 944, 848, 757, 694.

HRMS (ESI):  $m/z$  calcd for C<sub>27</sub>H<sub>17</sub>N<sub>2</sub>SO<sub>2</sub>, 433.1005 [M+H]<sup>+</sup>, found: 433.1033.

### 1-(4-Methylbenzoyl)-9-oxo-3-(p-tolylthio)-9H-indeno[2,1-c]pyridine-4-carbonitrile (4d)

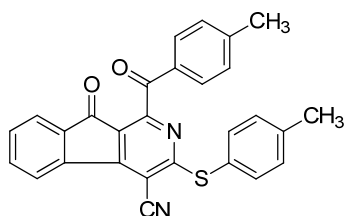

A yellow solid, mp: 197-197.5°C

<sup>1</sup>H NMR (400 MHz, DMSO-*d*<sub>6</sub>)  $\delta$  8.24 (d,  $J$  = 7.6 Hz, 1H, ArH), 7.92-7.88 (m, 1H, ArH), 7.75-7.74(m, 2H, ArH), 7.67 (d,  $J$  = 7.6 Hz, 2H, ArH), 7.46 (d,  $J$  = 7.6 Hz, 2H, ArH), 7.31 (d,  $J$  = 7.6 Hz, 2H, ArH), 7.19 (d,  $J$  = 7.6 Hz, 2H, ArH), 2.39 (s, 3H, CH<sub>3</sub>), 2.26 (s, 3H, CH<sub>3</sub>).

IR (KBr,  $\nu$ , cm<sup>-1</sup>): 3437, 2219, 1724, 1669, 1601, 1559, 1494, 1453, 1364, 1285, 1364, 1285, 1237, 1180, 1085, 1016, 938, 848, 812, 770, 753.

HRMS (ESI):  $m/z$  calcd for C<sub>28</sub>H<sub>19</sub>N<sub>2</sub>O<sub>2</sub>S, 447.1162 [M+H]<sup>+</sup>, found: 447.1182.

### 3-((4-Methoxyphenyl)thio)-1-(4-methylbenzoyl)-9-oxo-9H-indeno[2,1-c]pyridine-4-carbonitrile (4e)

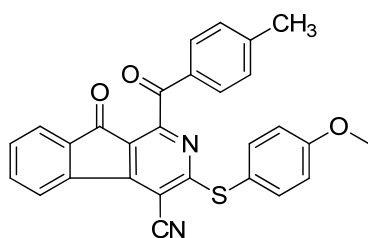

A yellow solid, mp: 181-181.5°C

<sup>1</sup>H NMR (400 MHz, DMSO-*d*<sub>6</sub>)  $\delta$  8.24 (d,  $J$  = 7.6 Hz, 1H, ArH), 7.97 – 7.83 (m, 3H, ArH), 7.78 – 7.70 (m, 2H, ArH), 7.53 – 7.46 (m, 2H, ArH), 7.41 – 7.28 (m, 2H, ArH), 7.00 – 6.86 (m, 2H, ArH), 3.72 (s, 3H, CH<sub>3</sub>), 2.09 (s, 3H, CH<sub>3</sub>).

<sup>13</sup>C NMR (100 MHz, DMSO-*d*<sub>6</sub>)  $\delta$  189.3, 187.6, 168.7, 164.5, 160.7, 155.4, 153.3, 138.5, 136.8, 136.1, 134.0, 133.0, 130.7, 124.9, 123.5, 122.5, 116.5, 116.2, 116.0, 115.1, 114.0, 99.0, 55.2, 18.5.

IR (KBr,  $\nu$ , cm<sup>-1</sup>): 3448, 2216, 1719, 1681, 1592, 1563, 1495, 1467, 1243, 1178, 1088, 1023, 942, 837, 757.

HRMS (ESI):  $m/z$  calcd for C<sub>28</sub>H<sub>19</sub>N<sub>2</sub>O<sub>3</sub>S, 463.1111 [M+H]<sup>+</sup>, found: 463.1139.

### 3-(Benzylthio)-1-(4-methylbenzoyl)-9-oxo-9H-indeno[2,1-c]pyridine-4-carbonitrile (4f)

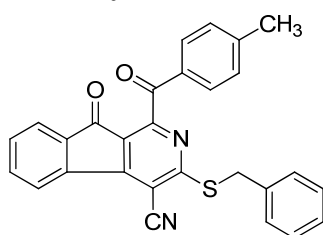

Electronic Supplementary Material (ESI) for Organic & Biomolecular Chemistry

This journal is © The Royal Society of Chemistry 2013

A pale yellow solid, mp: 194-195°C

$^1\text{H}$  NMR (400 MHz,  $\text{DMSO-}d_6$ )  $\delta$  8.20 (d,  $J = 7.6$  Hz, 1H, ArH), 7.91-7.87 (m, 1H, ArH), 7.80-7.73 (m, 4H, ArH), 7.38 (d,  $J = 8.0$  Hz, 2H, ArH), 7.34 – 7.27 (m, 2H, ArH), 7.22-7.18 (m, 3H, ArH), 4.51 (s, 2H,  $\text{CH}_2$ ), 2.43 (s, 3H,  $\text{CH}_3$ ).

IR (KBr,  $\nu$ ,  $\text{cm}^{-1}$ ): 3439, 2215, 1722, 1671, 1601, 1558, 1451, 1370, 1289, 1240, 1180, 1087, 1025, 942, 846, 755.

HRMS (ESI):  $m/z$  calcd for  $\text{C}_{28}\text{H}_{18}\text{N}_2\text{NaSO}_2$ , 469.0981  $[\text{M}+\text{Na}]^+$ , found: 469.0989.

**1-(4-Methoxybenzoyl)-9-oxo-3-(phenylthio)-9H-indeno[2,1-c]pyridine-4-carbonitrile (4g)**

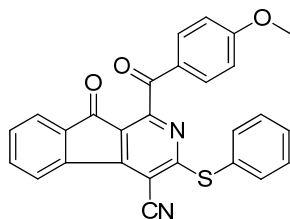

A green solid, mp: 196-197°C

$^1\text{H}$  NMR (400 MHz,  $\text{DMSO-}d_6$ )  $\delta$  8.22 (d,  $J = 7.6$  Hz, 1H, ArH), 7.90 – 7.86 (m, 1H, ArH), 7.75-7.72(m, 4H, ArH), 7.59-7.57 (m, 2H, ArH), 7.39-7.36 (m, 3H, ArH), 7.00 (d,  $J = 8.8$  Hz, 2H, ArH), 3.84 (s, 3H,  $\text{CH}_3$ ).

$^{13}\text{C}$  NMR (100 MHz,  $\text{DMSO-}d_6$ )  $\delta$  189.2, 187.7, 167.6, 164.3, 155.4, 154.3, 138.5, 136.0, 134.7, 133.9, 132.3, 130.0, 129.5, 126.9, 126.6, 124.8, 123.5, 122.3, 114.1, 114.0, 99.3, 55.7

IR (KBr,  $\nu$ ,  $\text{cm}^{-1}$ ): 3430, 2218, 1726, 1668, 1595, 1561, 1441, 1363, 1285, 1243, 1120, 850, 756.

HRMS (ESI):  $m/z$  calcd for  $\text{C}_{27}\text{H}_{17}\text{N}_2\text{O}_3\text{S}$ , 449.0954  $[\text{M}+\text{H}]^+$ , found: 449.0959.

**1-(4-Methoxybenzoyl)-9-oxo-3-(p-tolylthio)-9H-indeno[2,1-c]pyridine-4-carbonitrile (4h)**

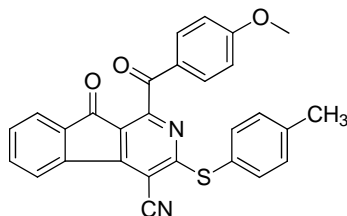

A green solid, mp: 184-185°C

$^1\text{H}$  NMR (400 MHz,  $\text{DMSO-}d_6$ )  $\delta$  8.24 (d,  $J = 7.6$  Hz, 1H, ArH), 7.90 (s, 1H, ArH), 7.74 (d,  $J = 5.2$  Hz, 4H, ArH), 7.47 (d,  $J = 7.6$  Hz, 2H, ArH), 7.21 (d,  $J = 7.6$  Hz, 2H, ArH), 7.02 (d,  $J = 8.0$  Hz, 2H, ArH), 3.86 (s, 3H,  $\text{CH}_3$ ), 2.27 (s, 3H,  $\text{CH}_3$ ).

$^{13}\text{C}$  NMR (100 MHz,  $\text{DMSO-}d_6$ )  $\delta$  189.2, 187.7, 175.6, 168.0, 164.3, 155.3, 154.3, 140.0, 138.5, 136.0, 134.7, 133.9, 133.8, 132.3, 130.1, 127.0, 124.8, 123.5, 123.0, 122.2, 114.2, 55.7, 20.8

IR (KBr,  $\nu$ ,  $\text{cm}^{-1}$ ): 3441, 2210, 1721, 1679, 1599, 1561, 1491, 1369, 1287, 1244, 1171, 1086, 848, 778.

HRMS (ESI):  $m/z$  calcd for  $\text{C}_{28}\text{H}_{19}\text{N}_2\text{O}_3\text{S}$ , 463.1111  $[\text{M}+\text{H}]^+$ , found: 463.1139.

**1-(4-Methoxybenzoyl)-3-((4-methoxyphenyl)thio)-9-oxo-9H-indeno[2,1-c]pyridine-4-carbonitrile (4i)**

Electronic Supplementary Material (ESI) for Organic & Biomolecular Chemistry  
This journal is © The Royal Society of Chemistry 2013

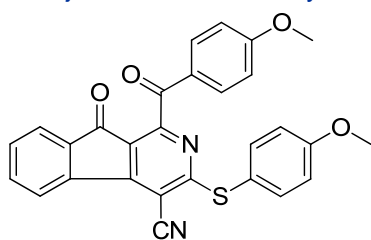

A yellow solid, mp: 205-206°C

$^1\text{H}$  NMR (400 MHz, DMSO- $d_6$ )  $\delta$  8.22 (d,  $J$  = 7.6 Hz, 1H, ArH), 7.97 – 7.81 (m, 1H, ArH), 7.77 – 7.64 (m, 4H, ArH), 7.49 (d,  $J$  = 8.8 Hz, 2H, ArH), 7.01 (d,  $J$  = 8.8 Hz, 2H, ArH), 6.93 (d,  $J$  = 8.8 Hz, 2H, ArH), 3.85 (s, 3H, CH<sub>3</sub>), 3.71 (s, 3H, CH<sub>3</sub>).

$^{13}\text{C}$  NMR (100 MHz, DMSO- $d_6$ )  $\delta$  189.2, 187.6, 168.6, 164.2, 160.7, 155.3, 154.3, 138.5, 136.8, 136.0, 133.9, 133.8, 132.3, 126.9, 124.8, 123.5, 122.2, 116.6, 115.1, 114.2, 114.0, 98.7, 55.7, 55.2  
IR (KBr, v, cm<sup>-1</sup>): 3445, 2211, 1721, 1665, 1596, 1561, 1494, 1270, 1245, 1180, 1020, 1087, 936, 858, 832, 756.

HRMS (ESI):  $m/z$  calcd for C<sub>28</sub>H<sub>18</sub>N<sub>2</sub>NaSO<sub>4</sub>, 501.0879 [M+Na]<sup>+</sup>, found: 501.0908.

### 3-(Benzylthio)-1-(4-methoxybenzoyl)-9-oxo-9H-indeno[2,1-c]pyridine-4-carbonitrile (4j)

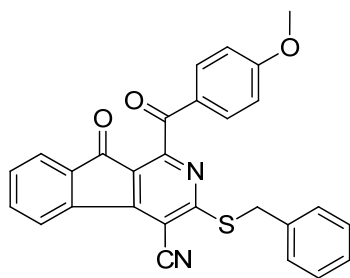

A pale yellow solid, mp: 181-182°C

$^1\text{H}$  NMR (400 MHz, DMSO- $d_6$ )  $\delta$  8.19 (d,  $J$  = 7.6 Hz, 1H, ArH), 7.86 (d,  $J$  = 8.8 Hz, 3H, ArH), 7.77 – 7.69 (m, 2H, ArH), 7.36 – 7.27 (m, 2H, ArH), 7.20 (d,  $J$  = 6.8 Hz, 3H, ArH), 7.07 (d,  $J$  = 8.8 Hz, 2H, ArH), 4.51 (s, 2H, CH<sub>2</sub>), 3.88 (s, 3H, CH<sub>3</sub>).

IR (KBr, v, cm<sup>-1</sup>): 3420, 2215, 1720, 1671, 1593, 1559, 1494, 1368, 1290, 1242, 1170, 1121, 1086, 941, 848, 759.

HRMS (ESI):  $m/z$  calcd for C<sub>28</sub>H<sub>18</sub>N<sub>2</sub>NaSO<sub>3</sub>, 485.0936 [M+Na]<sup>+</sup>, found: 485.0919.

### 1-Benzoyl-9-oxo-3-(phenylthio)-9H-indeno[2,1-c]pyridine-4-carbonitrile (4k)

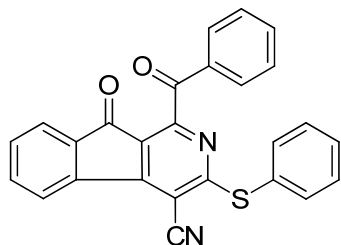

A yellow solid, 186.4-187.3°C

$^1\text{H}$  NMR (400 MHz, DMSO- $d_6$ )  $\delta$  8.25 (d,  $J$  = 7.2 Hz, 1H, ArH), 7.97 – 7.86 (m, 1H, ArH), 7.84 – 7.66 (m, 5H, ArH), 7.64 – 7.47 (m, 4H, ArH), 7.37-7.36 (m, 3H, ArH).

$^{13}\text{C}$  NMR (100 MHz, DMSO- $d_6$ )  $\delta$  190.8, 187.7, 167.7, 155.4, 153.8, 138.5, 136.1, 134.7, 133.9, 133.9, 133.8, 130.0, 129.8, 129.4, 128.9, 126.5, 124.9, 123.6, 122.6, 114.0, 99.4,

IR (KBr, v, cm<sup>-1</sup>): 3435, 2218, 1720, 1673, 1597, 1561, 1451, 1365, 1283, 1240, 1183, 1086, 1019, 941, 836, 745.

Electronic Supplementary Material (ESI) for Organic & Biomolecular Chemistry  
This journal is © The Royal Society of Chemistry 2013

HRMS (ESI):  $m/z$  calcd for  $C_{26}H_{15}N_2O_2S$ , 419.0849  $[M+H]^+$ , found: 419.0818.

### 1-Benzoyl-9-oxo-3-(p-tolylthio)-9H-indeno[2,1-c]pyridine-4-carbonitrile (4l)

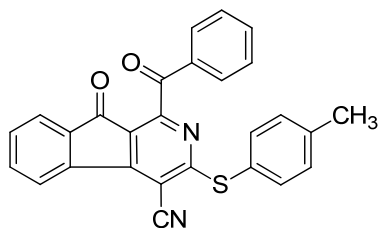

A yellow solid, mp: 178-179°C

$^1H$  NMR (400 MHz, DMSO- $d_6$ )  $\delta$  8.25 (d,  $J = 6.8$  Hz, 1H, ArH), 7.91 (s, 1H, ArH), 7.79-7.71 (m, 5H, ArH), 7.53-7.45 (m, 4H, ArH), 7.18 (d,  $J = 6.8$  Hz, 2H, ArH), 2.25 (s, 3H,  $CH_3$ ).

$^{13}C$  NMR (100 MHz, DMSO- $d_6$ )  $\delta$  190.9, 187.6, 168.1, 155.3, 153.8, 140.0, 138.5, 136.0, 134.7, 134.6, 133.9, 133.9, 130.1, 129.8, 128.9, 124.8, 123.6, 122.9, 122.5, 114.0, 99.2, 20.8

IR (KBr,  $\nu$ ,  $cm^{-1}$ ): 3413, 2218, 1720, 1687, 1560, 1451, 1367, 1239, 1182, 1015, 942, 867, 760, 656.

HRMS (ESI):  $m/z$  calcd for  $C_{27}H_{17}N_2O_2S$ , 433.1005  $[M+H]^+$ , found: 433.1015.

### 1-Benzoyl-3-((4-methoxyphenyl)thio)-9-oxo-9H-indeno[2,1-c]pyridine-4-carbonitrile (4m)

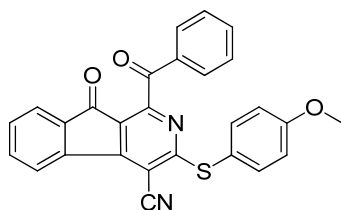

An orange solid, mp: 204-205°C

$^1H$  NMR (400 MHz, DMSO)  $\delta$  8.25 (d,  $J = 7.6$  Hz, 1H, ArH), 7.98 – 7.87 (m, 1H, ArH), 7.83 – 7.74 (m, 4H, ArH), 7.73 – 7.66 (m, 1H, ArH), 7.56 – 7.47 (m, 4H, ArH), 6.95 – 6.87 (m, 2H, ArH), 3.72 (s, 3H,  $CH_3$ )

IR (KBr,  $\nu$ ,  $cm^{-1}$ ): 3413, 2218, 1720, 1687, 1560, 1451, 1367, 1239, 1182, 1015, 942, 867, 760, 656.

HRMS (ESI):  $m/z$  calcd for  $C_{27}H_{17}N_2O_3S$ , 449.0954  $[M+H]^+$ , found: 449.0931.

### 1-Benzoyl-3-(benzylthio)-9-oxo-9H-indeno[2,1-c]pyridine-4-carbonitrile (4n)

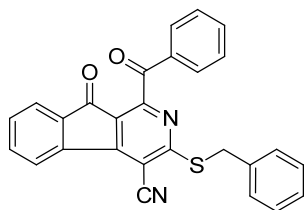

A pale yellow solid, mp: 236-237°C

$^1H$  NMR (400 MHz, DMSO- $d_6$ )  $\delta$  8.19 (d,  $J = 7.6$  Hz, 1H, ArH), 7.93 – 7.85 (m, 3H, ArH), 7.80 – 7.68 (m, 3H, ArH), 7.60-7.56 (m, 2H, ArH), 7.3-7.28 (m, 2H, ArH), 7.22 – 7.10 (m, 3H, ArH), 4.50 (s, 2H,  $CH_2$ ).

IR (KBr,  $\nu$ ,  $cm^{-1}$ ): 3415, 2219, 1716, 1674, 1565, 1466, 1283, 1234, 1182, 1121, 1086, 1018, 943, 837, 745.

Electronic Supplementary Material (ESI) for Organic & Biomolecular Chemistry  
This journal is © The Royal Society of Chemistry 2013

HRMS (ESI):  $m/z$  calcd for  $C_{27}H_{16}N_2NaSO_2$ , 455.0830  $[M+Na]^+$ , found: 455.0839.

### 1-Benzoyl-3-(cyclohexylthio)-9-oxo-9H-indeno[2,1-c]pyridine-4-carbonitrile (4o)

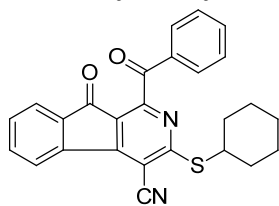

A pale yellow solid, mp: 174-175°C

$^1H$  NMR (400 MHz, DMSO- $d_6$ )  $\delta$  8.19 (d,  $J = 7.6$  Hz, 1H, ArH), 7.93-7.86 (m, 3H, ArH), 7.74 (d,  $J = 6.4$  Hz, 3H, ArH), 7.59-7.55 (m, 2H, ArH), 1.96 (d,  $J = 10.8$  Hz, 2H, CH<sub>2</sub>), 1.70 – 1.39 (m, 5H, CH<sub>2</sub>), 1.25 (d,  $J = 7.6$  Hz, 3H, CH<sub>2</sub>).

IR (KBr,  $\nu$ ,  $cm^{-1}$ ): 3425, 2214, 1714, 1681, 1567, 1450, 1285, 1238, 1088, 1020, 947, 866, 774.

HRMS (ESI):  $m/z$  calcd for  $C_{26}H_{20}N_2NaSO_2$ , 447.1143  $[M+Na]^+$ , found: 447.1139.

### 1-(4-Fluorobenzoyl)-9-oxo-3-(phenylthio)-9H-indeno[2,1-c]pyridine-4-carbonitrile (4p)

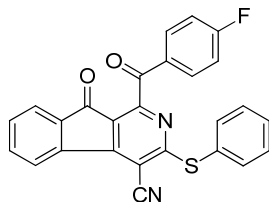

A pale yellow solid, mp: 191-192°C

$^1H$  NMR (400 MHz, DMSO- $d_6$ )  $\delta$  8.25 (d,  $J = 7.6$  Hz, 1H, ArH), 8.00 – 7.84 (m, 3H, ArH), 7.81 – 7.71 (m, 2H, ArH), 7.65 – 7.54 (m, 2H, ArH), 7.39-7.33 (m, 5H, ArH).

$^{13}C$  NMR (100 MHz, DMSO- $d_6$ )  $\delta$  189.3, 187.6, 167.8, 165.8 ( $J_{CF} = 253.3$  Hz), 155.5, 153.4, 138.5, 136.1, 134.8, 133.9, 133.0 ( $J_{CF} = 10.0$  Hz), 130.6 ( $J_{CF} = 2.8$  Hz), 130.0, 129.4, 126.5, 124.9, 123.6, 122.7, 116.1 ( $J_{CF} = 22.1$  Hz), 114.0, 112.7, 99.5.

IR (KBr,  $\nu$ ,  $cm^{-1}$ ): 3414, 2216, 1718, 1675, 1597, 1567, 1284, 1240, 1157, 1121, 1021, 941, 861, 761.

HRMS (ESI):  $m/z$  calcd for  $C_{26}H_{13}FN_2NaSO_2$ , 459.0574  $[M+Na]^+$ , found: 459.0551.

### 1-(4-Fluorobenzoyl)-9-oxo-3-(p-tolylthio)-9H-indeno[2,1-c]pyridine-4-carbonitrile (4q)

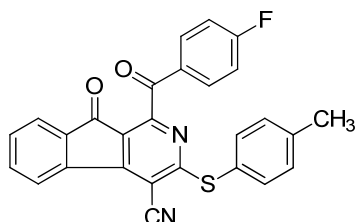

A yellow solid, mp: 196-197°C

$^1H$  NMR (400 MHz, DMSO- $d_6$ )  $\delta$  8.23 (d,  $J = 7.6$  Hz, 1H, ArH), 7.89-7.73 (m, 3H, ArH), 7.76-7.73 (m, 2H, ArH), 7.45 (d,  $J = 8.0$  Hz, 2H, ArH), 7.36-7.31 (m, 2H, ArH), 7.18 (d,  $J = 8.0$  Hz, 2H, ArH), 2.25 (s, 3H, CH<sub>3</sub>).

IR (KBr,  $\nu$ ,  $cm^{-1}$ ): 3413, 2220, 1717, 1687, 1594, 1563, 1410, 1285, 1244, 1230, 1152, 941, 851, 810, 760.

HRMS (ESI):  $m/z$  calcd for  $C_{27}H_{16}FN_2SO_2$ , 451.0911  $[M+H]^+$ , found: 451.0900.

Electronic Supplementary Material (ESI) for Organic & Biomolecular Chemistry  
This journal is © The Royal Society of Chemistry 2013

**3-(Benzylthio)-1-(4-fluorobenzoyl)-9-oxo-9H-indeno[2,1-c]pyridine-4-carbonitrile (4r)**

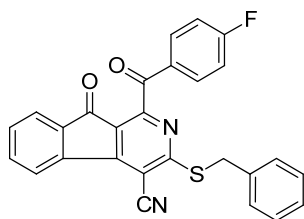

A pale orange solid, mp: 250-252°C

$^1\text{H NMR}$  (400 MHz,  $\text{DMSO-}d_6$ )  $\delta$  8.20 (d,  $J = 7.6$  Hz, 1H, ArH), 8.07 – 7.95 (m, 2H, ArH), 7.95 – 7.86 (m, 1H, ArH), 7.82 – 7.70 (m, 2H, ArH), 7.43-7.39 (m, 2H, ArH), 7.36 – 7.27 (m, 2H, ArH), 7.25 – 7.10 (m, 2H, ArH), 4.51 (s, 2H,  $\text{CH}_2$ ).

IR (KBr,  $\nu$ ,  $\text{cm}^{-1}$ ): 3425, 2216, 1722, 1683, 1598, 1561, 1413, 1285, 1240, 1025, 943, 855, 759.

HRMS (ESI):  $m/z$  calcd for  $\text{C}_{27}\text{H}_{15}\text{FN}_2\text{SNaO}_2$ , 473.0730  $[\text{M}+\text{Na}]^+$ , found: 473.0704.

**1-(4-Chlorobenzoyl)-9-oxo-3-(phenylthio)-9H-indeno[2,1-c]pyridine-4-carbonitrile (4s)**

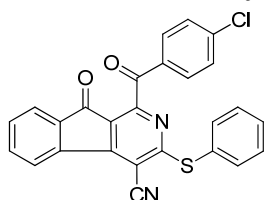

A pale yellow solid, mp: 170-172°C

$^1\text{H NMR}$  (400 MHz,  $\text{DMSO-}d_6$ )  $\delta$  8.26 (d,  $J = 7.6$  Hz, 1H, ArH), 8.01 – 7.87 (m, 1H, ArH), 7.82-7.75 (m, 4H, ArH), 7.59 (d,  $J = 8.0$  Hz, 4H, ArH), 7.39-7.37 (m, 3H, ArH).

IR (KBr,  $\nu$ ,  $\text{cm}^{-1}$ ): 3412, 2214, 1719, 1674, 1618, 1570, 1475, 1283, 1239, 1187, 1089, 1022, 944, 852, 752.

HRMS (ESI):  $m/z$  calcd for  $\text{C}_{26}\text{H}_{13}\text{ClN}_2\text{SNaO}_2$ , 475.0278  $[\text{M}+\text{Na}]^+$ , found: 475.0264.

**1-(4-Chlorobenzoyl)-9-oxo-3-(p-tolylthio)-9H-indeno[2,1-c]pyridine-4-carbonitrile (4t)**

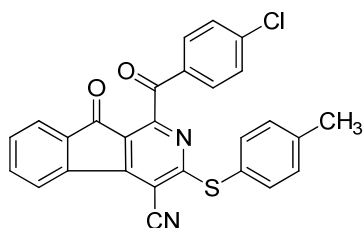

A yellow solid, mp: 223-224°C

$^1\text{H NMR}$  (400 MHz,  $\text{DMSO-}d_6$ )  $\delta$  8.25 (d,  $J = 7.6$  Hz, 1H, ArH), 8.00 – 7.85 (m, 1H, ArH), 7.86 – 7.69 (m, 4H, ArH), 7.61 – 7.53 (m, 2H, ArH), 7.46 (d,  $J = 8.0$  Hz, 2H, ArH), 7.19 (d,  $J = 8.0$  Hz, 2H, ArH), 2.27 (s, 3H,  $\text{CH}_3$ ).

IR (KBr,  $\nu$ ,  $\text{cm}^{-1}$ ): 3425, 2220, 1719, 1691, 1562, 1486, 1398, 1367, 1286, 1242, 1182, 1084, 1015, 941, 848, 810, 752.

HRMS (ESI):  $m/z$  calcd for  $\text{C}_{27}\text{H}_{15}\text{ClN}_2\text{SNaO}_2$ , 489.0435  $[\text{M}+\text{Na}]^+$ , found: 489.0432.

**1-(4-Chlorobenzoyl)-3-((4-methoxyphenyl)thio)-9-oxo-9H-indeno[2,1-c]pyridine-4-carbonitrile (4u)**



Electronic Supplementary Material (ESI) for Organic & Biomolecular Chemistry  
This journal is © The Royal Society of Chemistry 2013

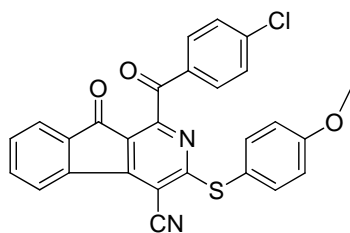

A yellow solid, mp: 206-207°C

$^1\text{H}$  NMR (400 MHz, DMSO- $d_6$ )  $\delta$  8.25 (d,  $J = 7.6$  Hz, 1H, ArH), 7.93-7.89 (m, 1H, ArH), 7.85 – 7.69 (m, 4H, ArH), 7.60-7.58 (m, 2H, ArH), 7.50-7.48 (m, 2H, ArH), 6.93 (d,  $J = 8.4$  Hz, 2H, ArH), 3.73 (s, 3H, CH<sub>3</sub>).

IR (KBr,  $\nu$ ,  $\text{cm}^{-1}$ ): 3415, 2219, 1720, 1686, 1592, 1566, 1496, 1399, 1367, 1288, 1258, 1241, 1178, 1086, 1021, 942, 850, 756.

HRMS (ESI):  $m/z$  calcd for C<sub>27</sub>H<sub>15</sub>ClN<sub>2</sub>SNaO<sub>3</sub>, 505.0384 [M+Na]<sup>+</sup>, found: 505.0366.

### 3-(Benzylthio)-1-(4-chlorobenzoyl)-9-oxo-9H-indeno[2,1-c]pyridine-4-carbonitrile (4v)

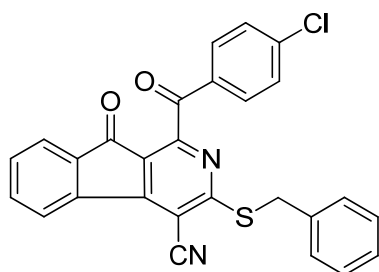

A pale orange solid, 246-247°C

$^1\text{H}$  NMR (400 MHz, DMSO- $d_6$ )  $\delta$  8.20 (d,  $J = 7.6$  Hz, 1H, ArH), 8.01 – 7.82 (m, 3H, ArH), 7.77-7.74 (m, 2H, ArH), 7.65 (d,  $J = 8.8$  Hz, 2H, ArH), 7.36 – 7.25 (m, 2H, ArH), 7.22-7.18 (m, 2H, ArH), 4.51 (s, 2H, CH<sub>2</sub>).

IR (KBr,  $\nu$ ,  $\text{cm}^{-1}$ ): 3430, 2215, 1719, 1679, 1561, 1402, 1238, 1174, 1087, 1023, 1014, 942, 852, 756.

HRMS (ESI):  $m/z$  calcd for C<sub>27</sub>H<sub>15</sub>FN<sub>2</sub>SNaO<sub>2</sub>, 489.0435 [M+Na]<sup>+</sup>, found: 489.0434.

### 1-(4-Bromobenzoyl)-3-((4-methoxyphenyl)thio)-9-oxo-9H-indeno[2,1-c]pyridine-4-carbonitrile (4w)

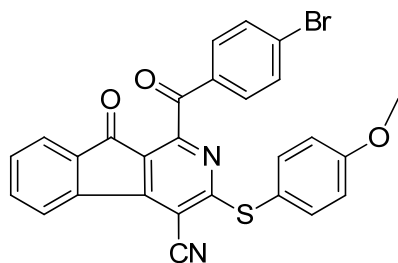

A yellow solid, mp: 207-208°C

$^1\text{H}$  NMR (400 MHz, DMSO- $d_6$ )  $\delta$  8.21 (d,  $J = 7.6$  Hz, 1H, ArH), 7.93 – 7.80 (m, 1H, ArH), 7.75 – 7.61 (m, 6H, ArH), 7.52 – 7.39 (m, 2H, ArH), 7.01 – 6.72 (m, 2H, ArH), 3.70 (s, 3H, CH<sub>3</sub>).

IR (KBr,  $\nu$ ,  $\text{cm}^{-1}$ ): 3443, 2221, 1720, 1687, 1564, 14095, 1397, 1242, 1177, 1089, 1021, 940, 849, 756.

HRMS (ESI):  $m/z$  calcd for C<sub>27</sub>H<sub>15</sub>BrN<sub>2</sub>SNaO<sub>3</sub>, 529.0042 [M+Na]<sup>+</sup>, found: 529.0055.

Electronic Supplementary Material (ESI) for Organic & Biomolecular Chemistry  
This journal is © The Royal Society of Chemistry 2013

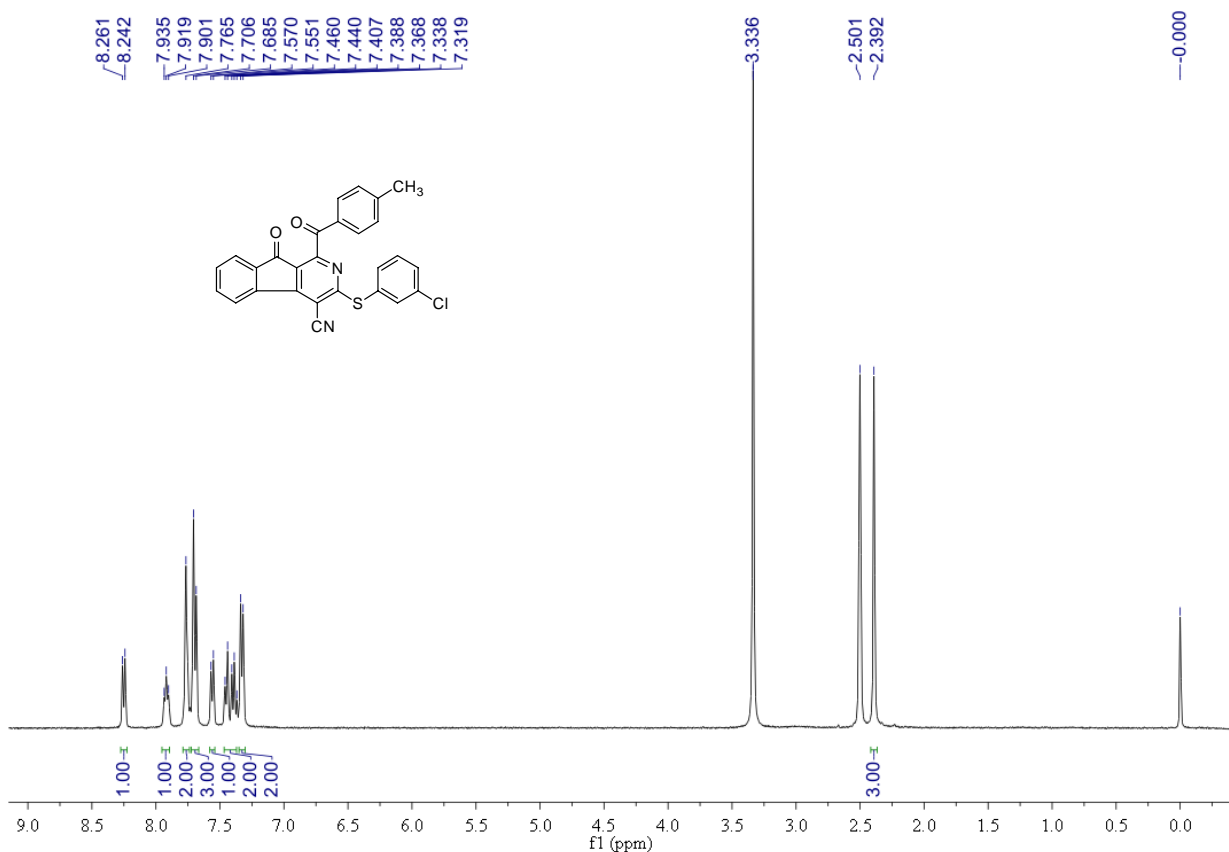

<sup>1</sup>H NMR Spectrum of Compound 4a

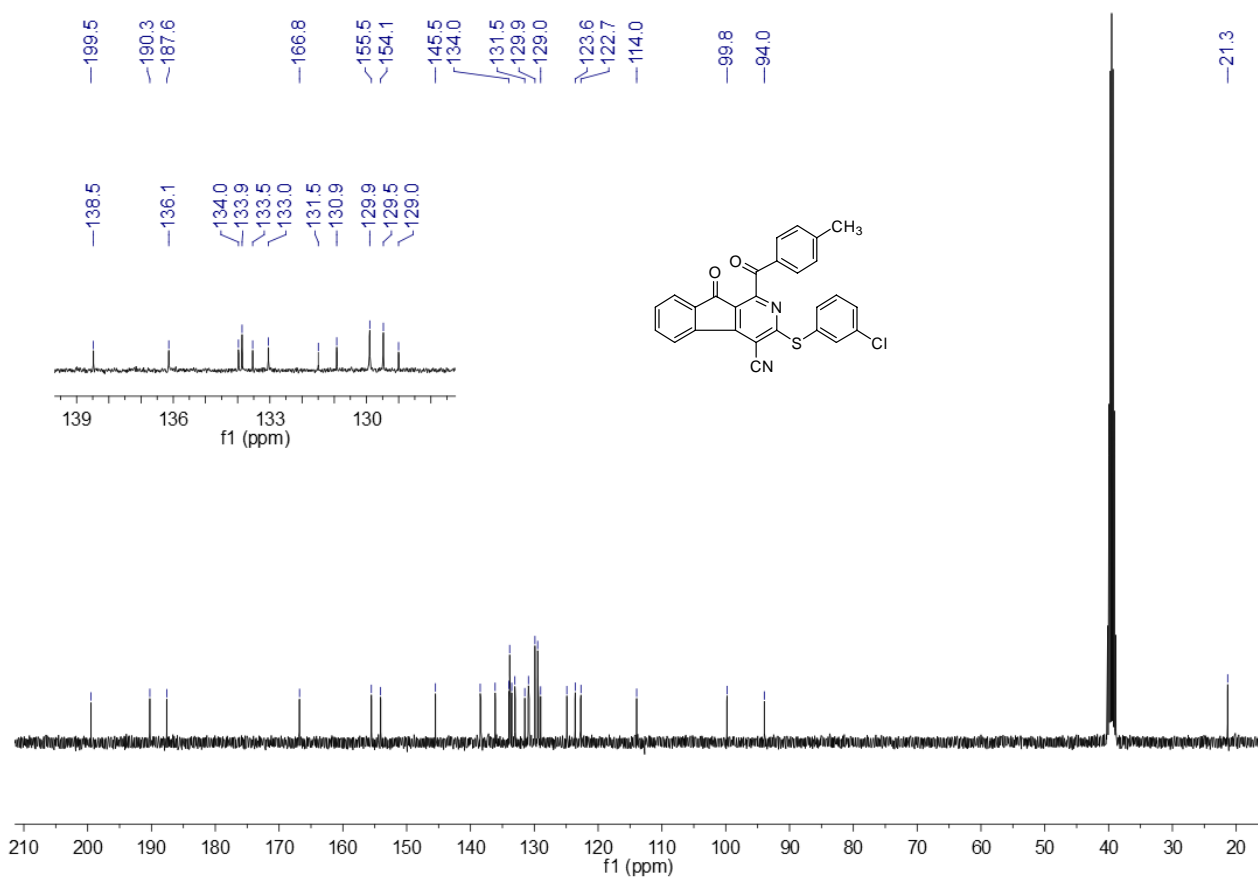

<sup>13</sup>C NMR Spectrum of Compound 4a

Electronic Supplementary Material (ESI) for Organic & Biomolecular Chemistry  
This journal is © The Royal Society of Chemistry 2013

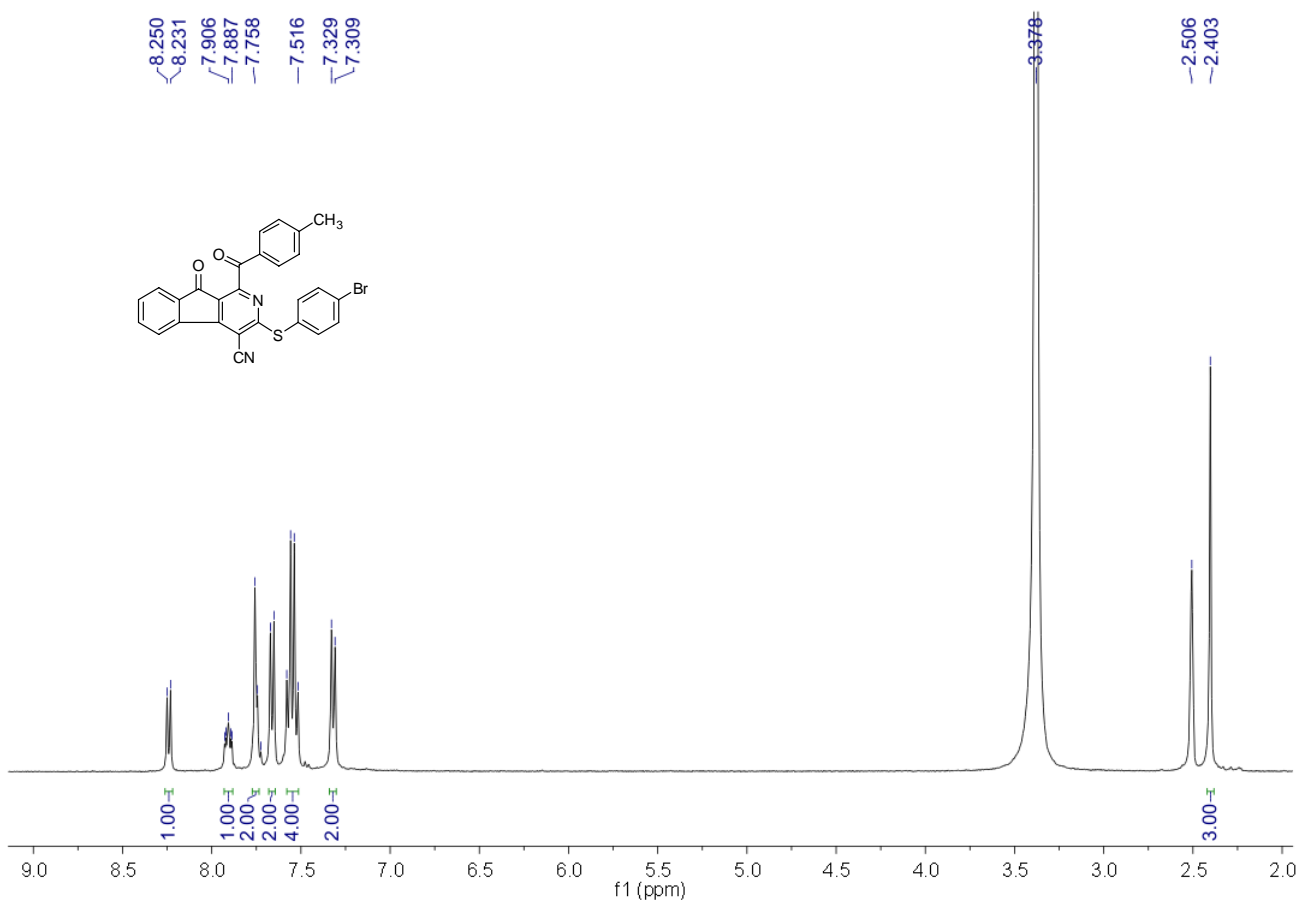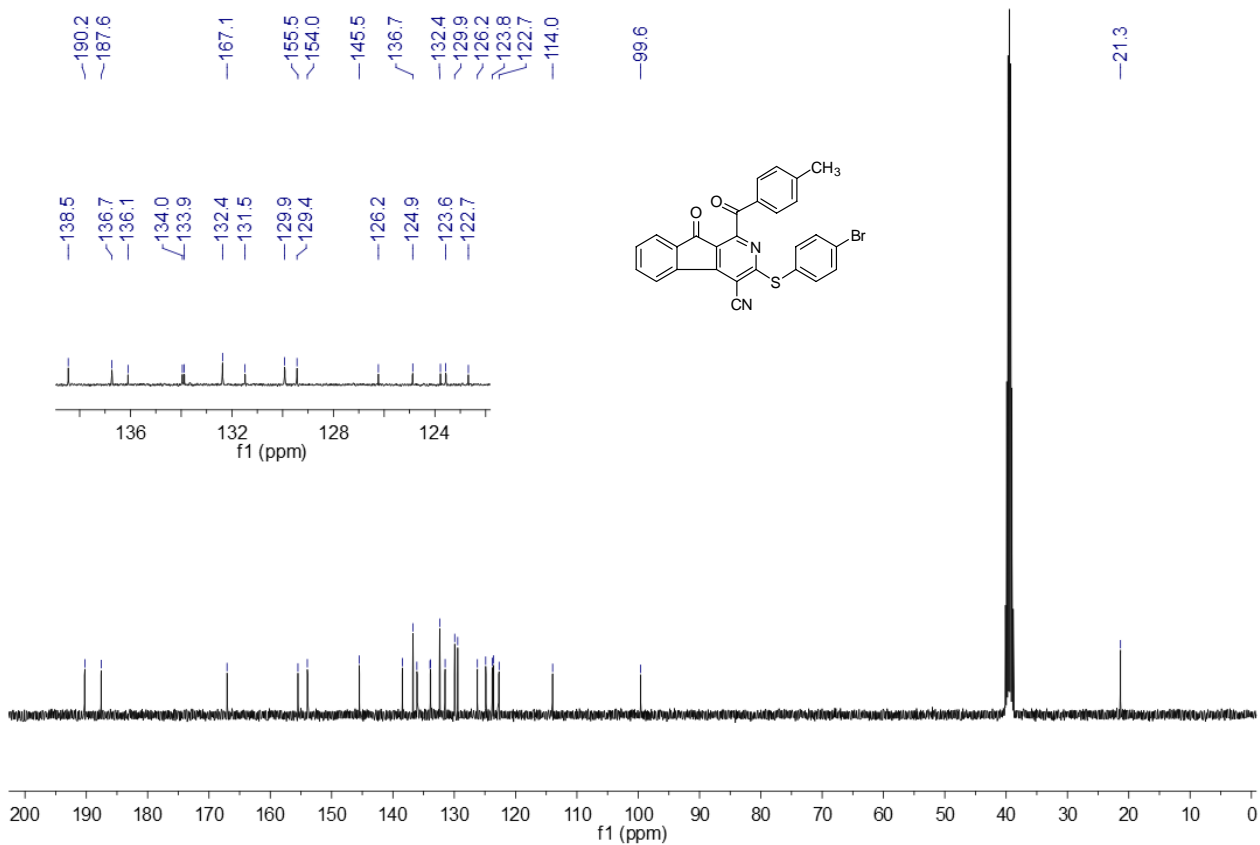

**<sup>13</sup>C NMR Spectrum of Compound 4b**

Electronic Supplementary Material (ESI) for Organic & Biomolecular Chemistry  
This journal is © The Royal Society of Chemistry 2013

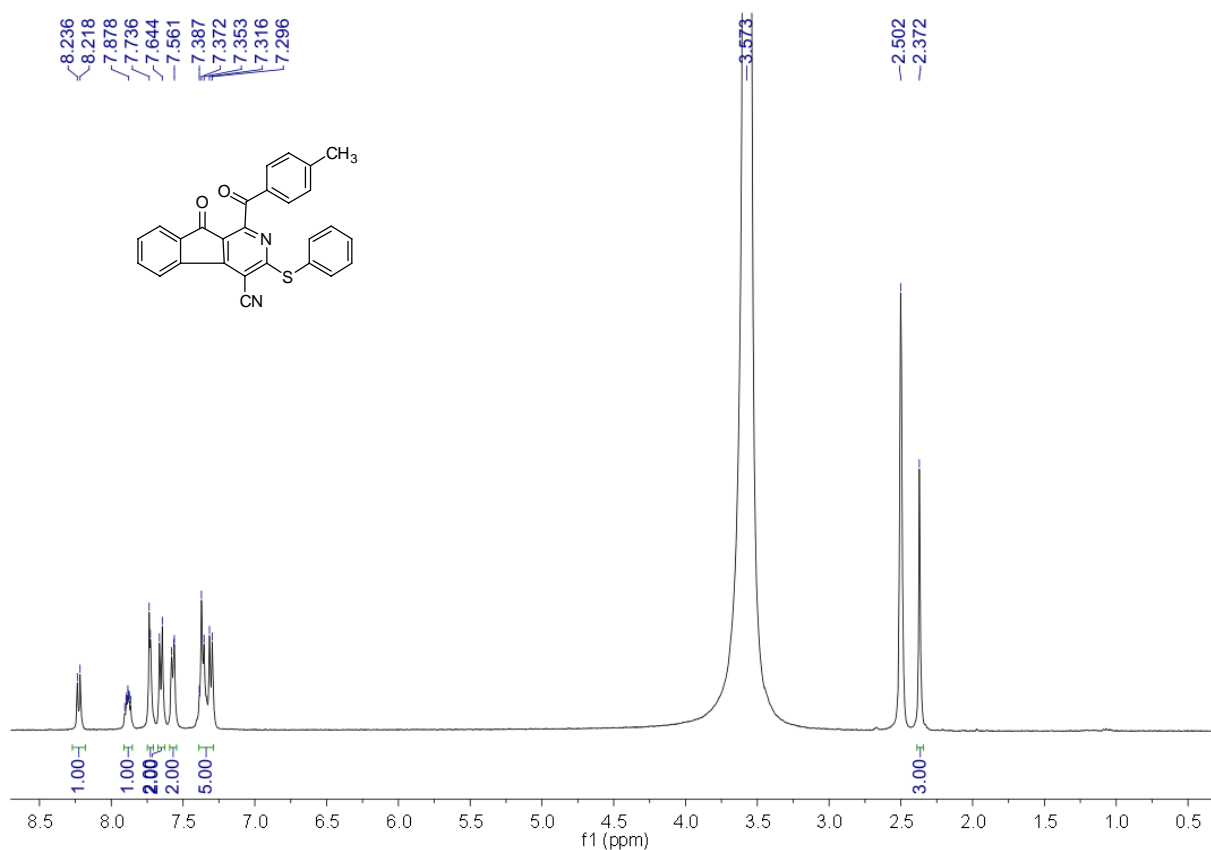

**<sup>1</sup>H NMR Spectrum of Compound 4c**

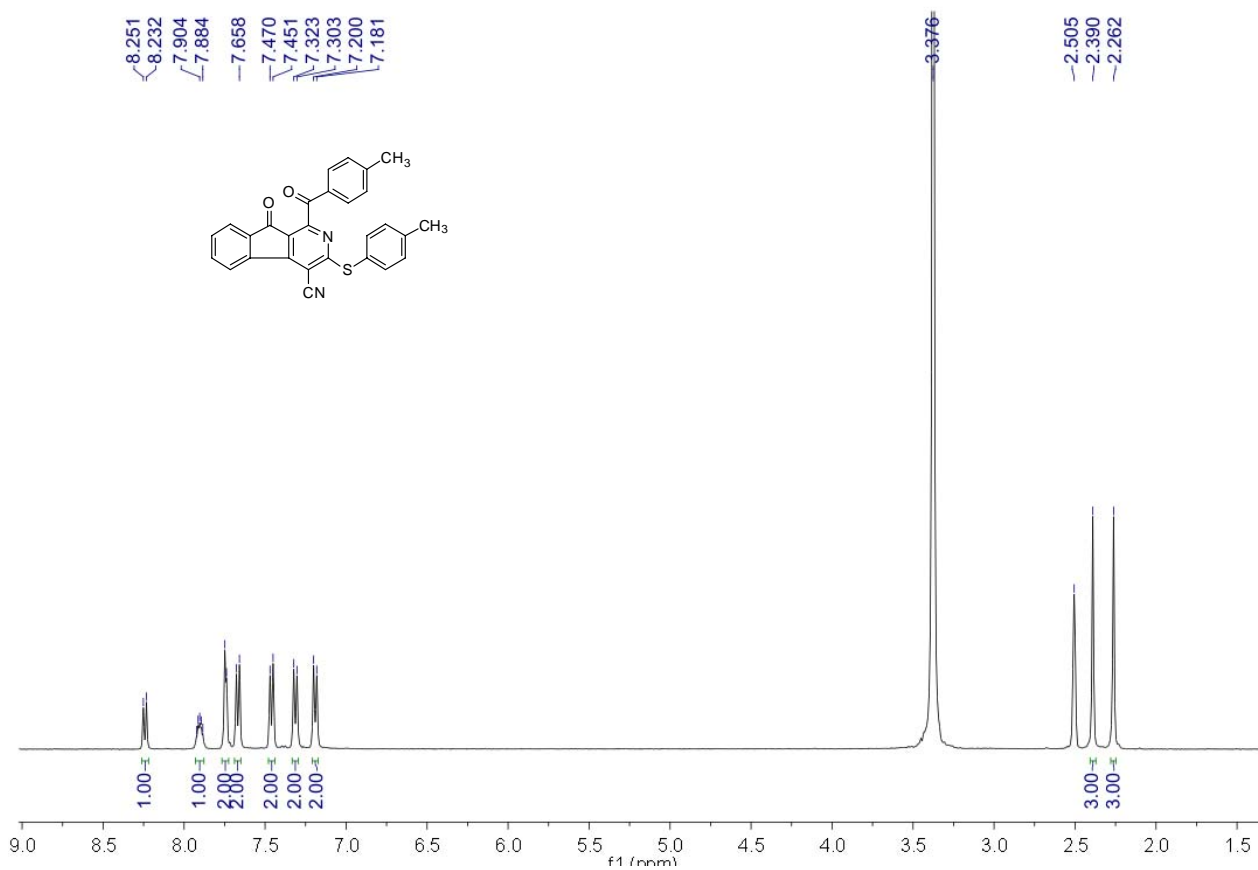

**<sup>1</sup>H NMR Spectrum of Compound 4d**

Electronic Supplementary Material (ESI) for Organic & Biomolecular Chemistry  
This journal is © The Royal Society of Chemistry 2013

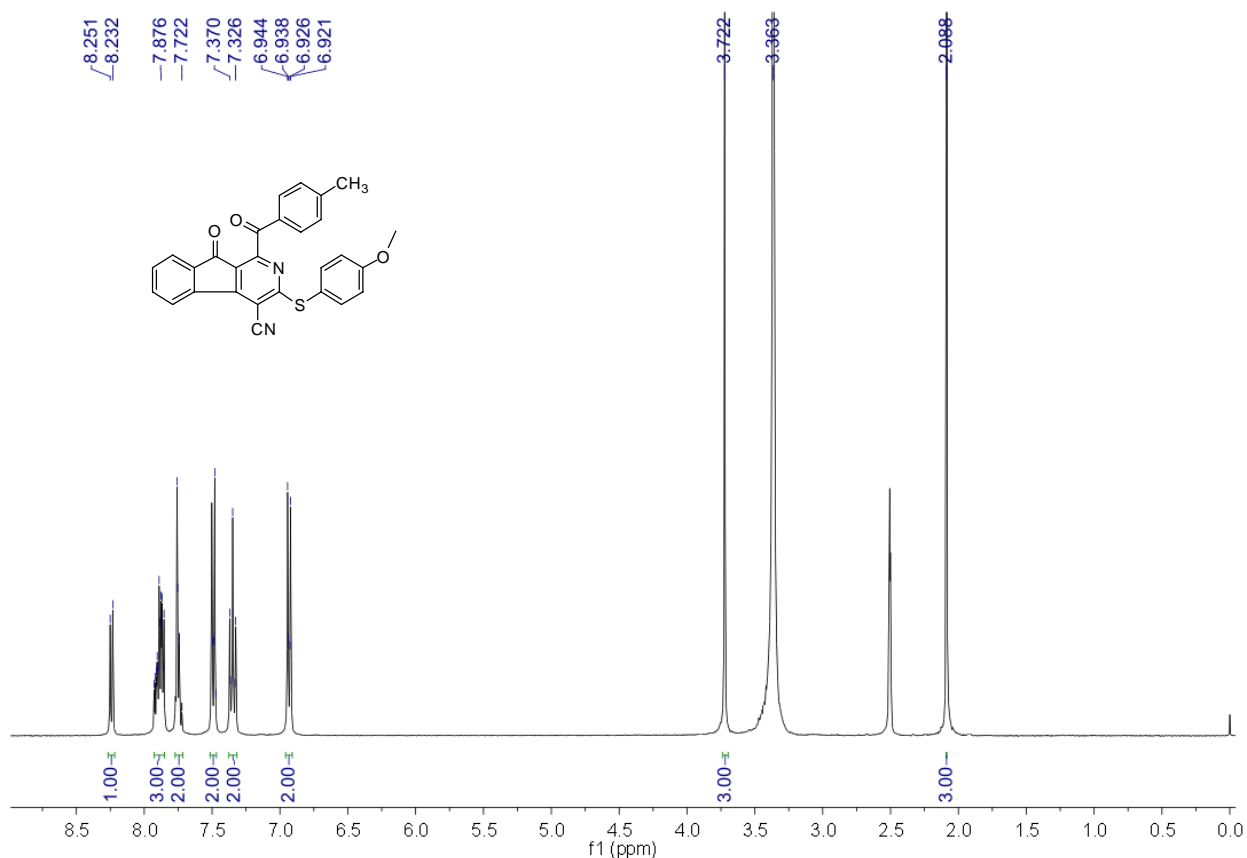

<sup>1</sup>H NMR Spectrum of Compound 4e

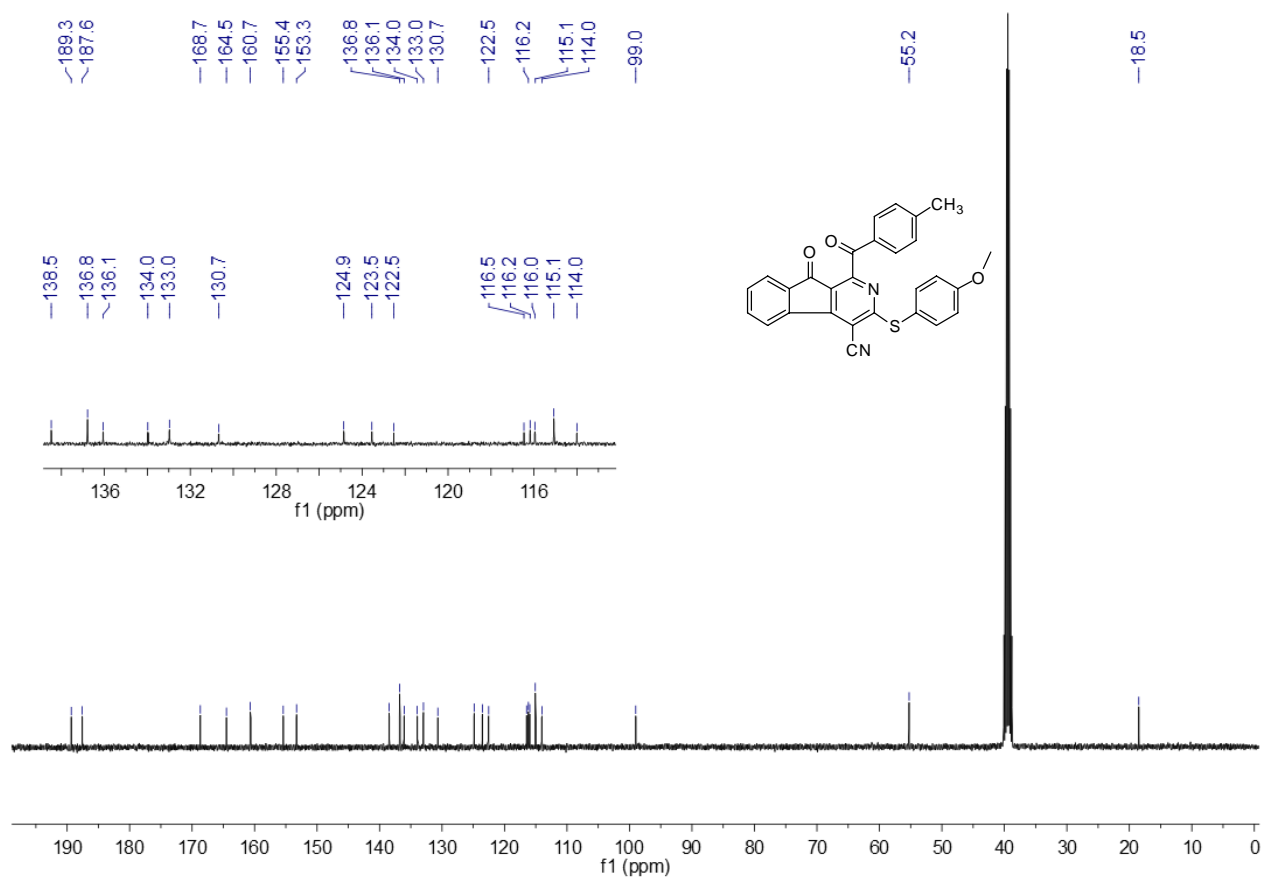

<sup>13</sup>C NMR Spectrum of Compound 4e

Electronic Supplementary Material (ESI) for Organic & Biomolecular Chemistry  
This journal is © The Royal Society of Chemistry 2013

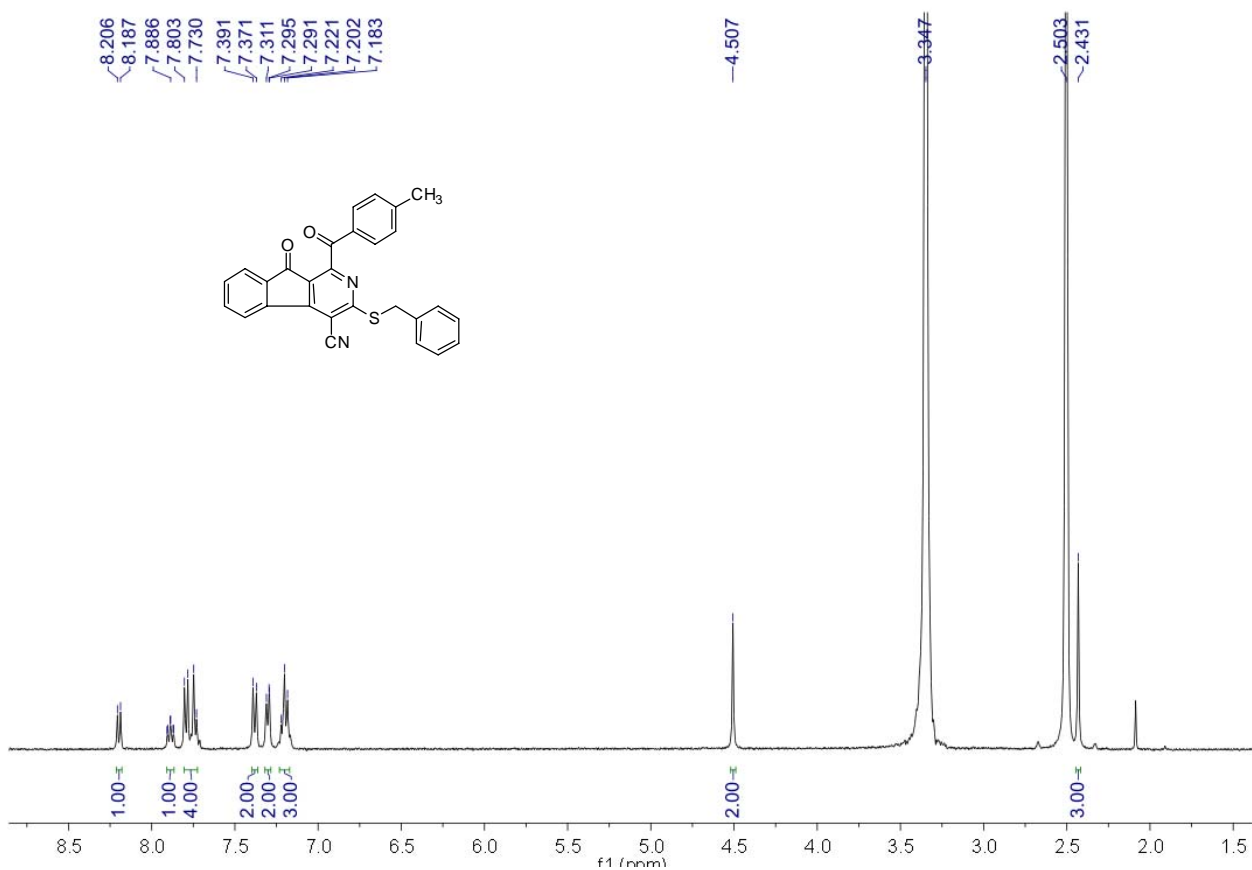

**<sup>1</sup>H NMR Spectrum of Compound 4f**

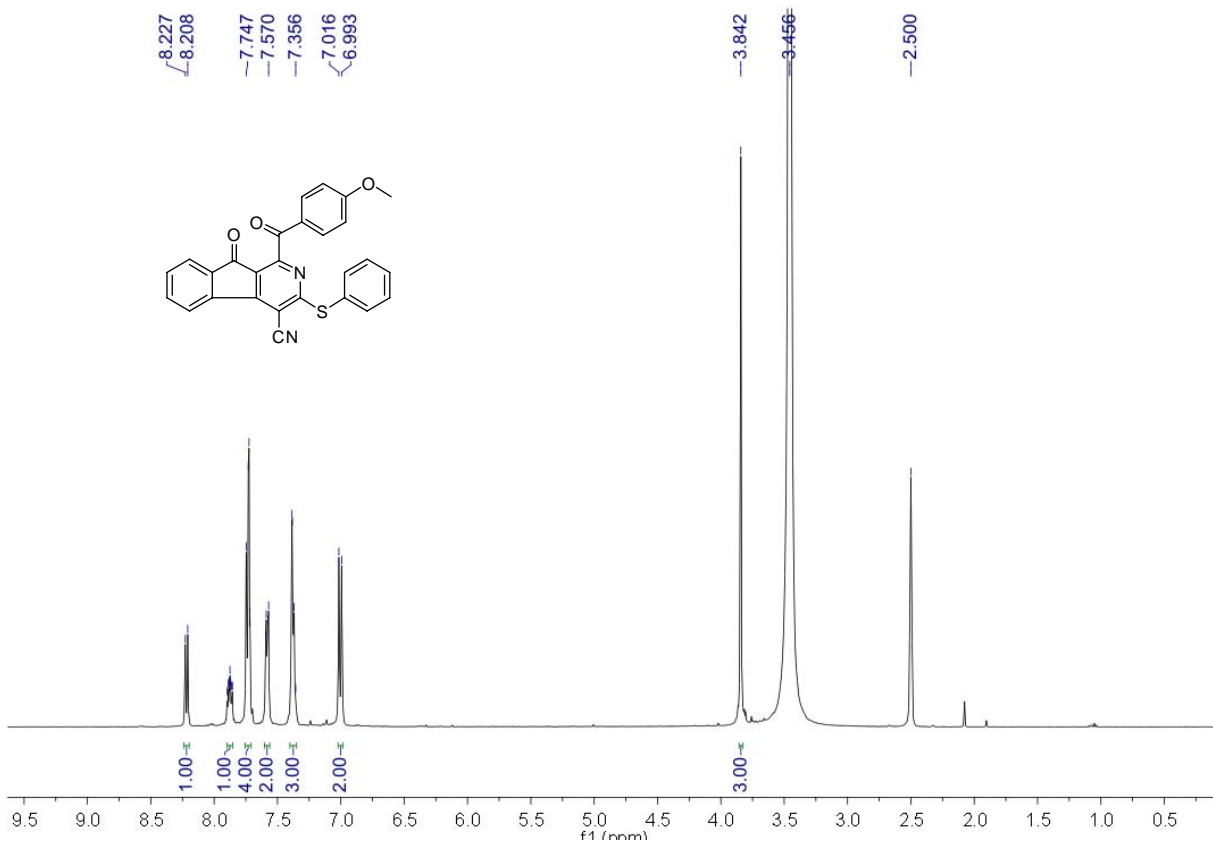

**<sup>1</sup>H NMR Spectrum of Compound 4g**

Electronic Supplementary Material (ESI) for Organic & Biomolecular Chemistry  
This journal is © The Royal Society of Chemistry 2013

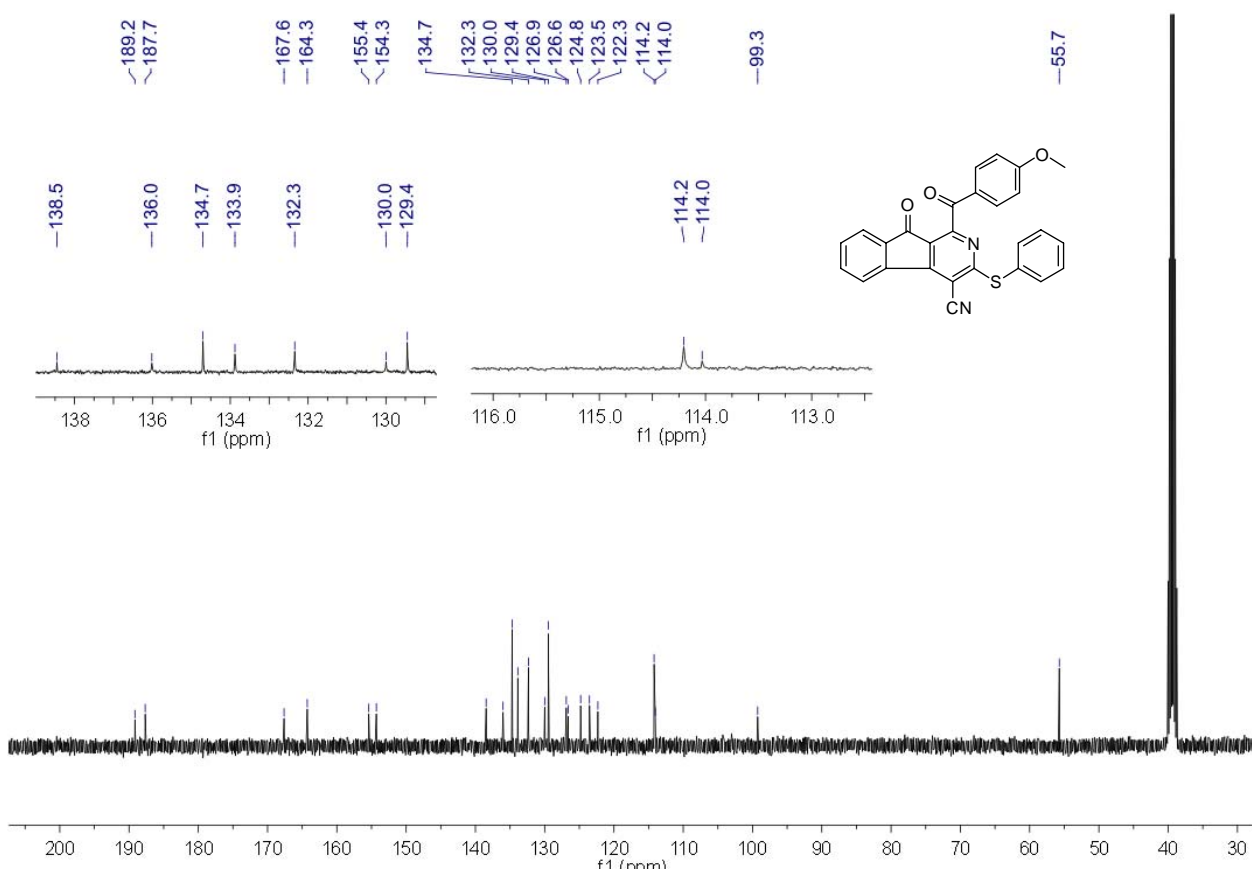

**<sup>13</sup>C NMR Spectrum of Compound 4g**

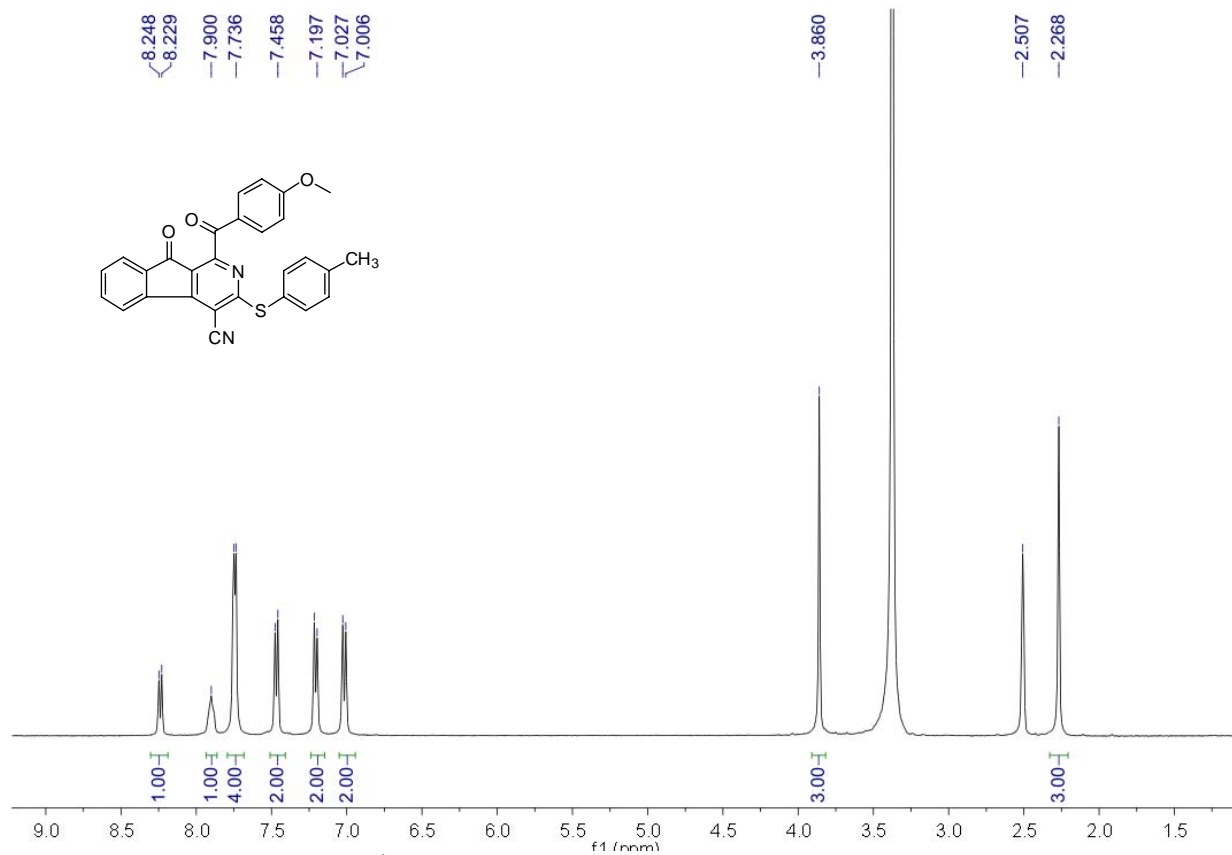

**<sup>1</sup>H NMR Spectrum of Compound 4h**

Electronic Supplementary Material (ESI) for Organic & Biomolecular Chemistry  
This journal is © The Royal Society of Chemistry 2013

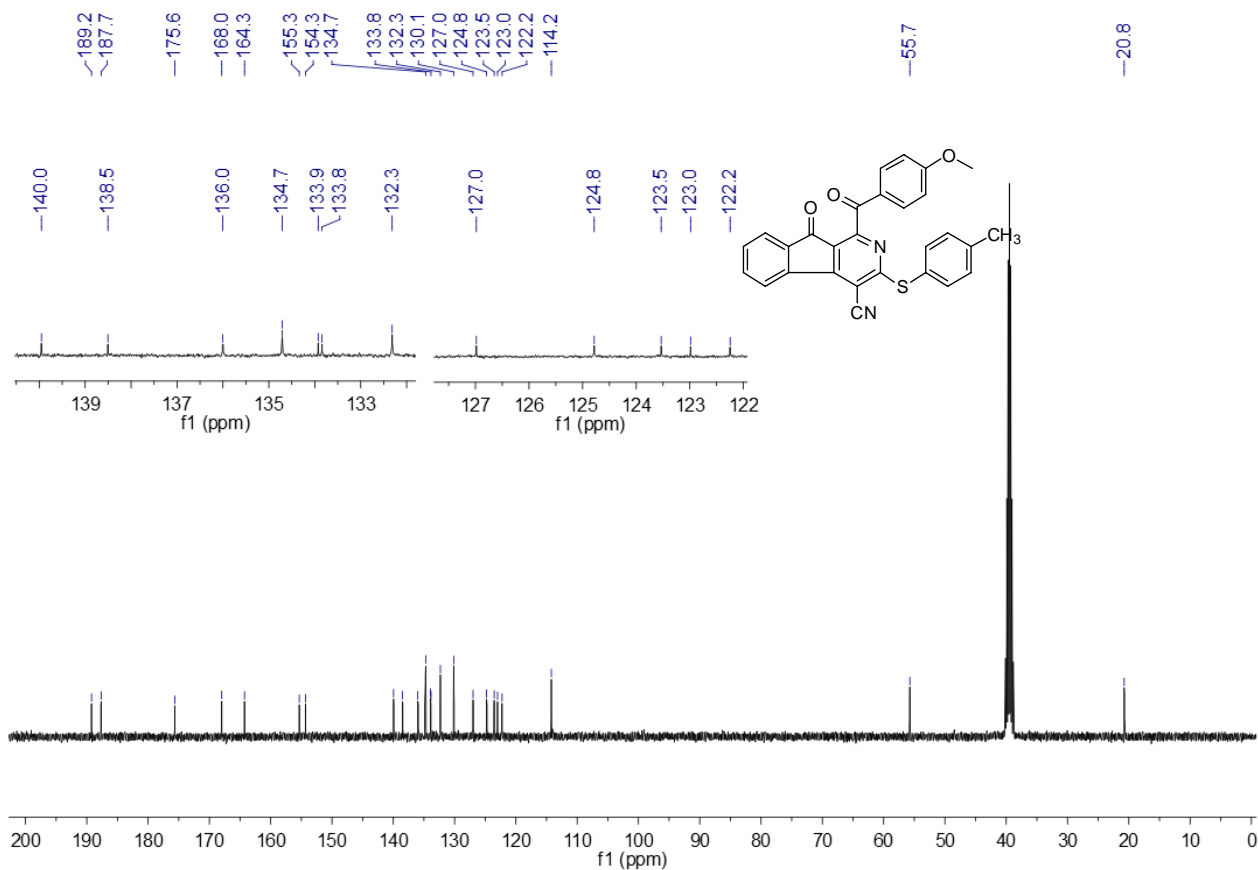

**<sup>13</sup>C NMR Spectrum of Compound 4h**

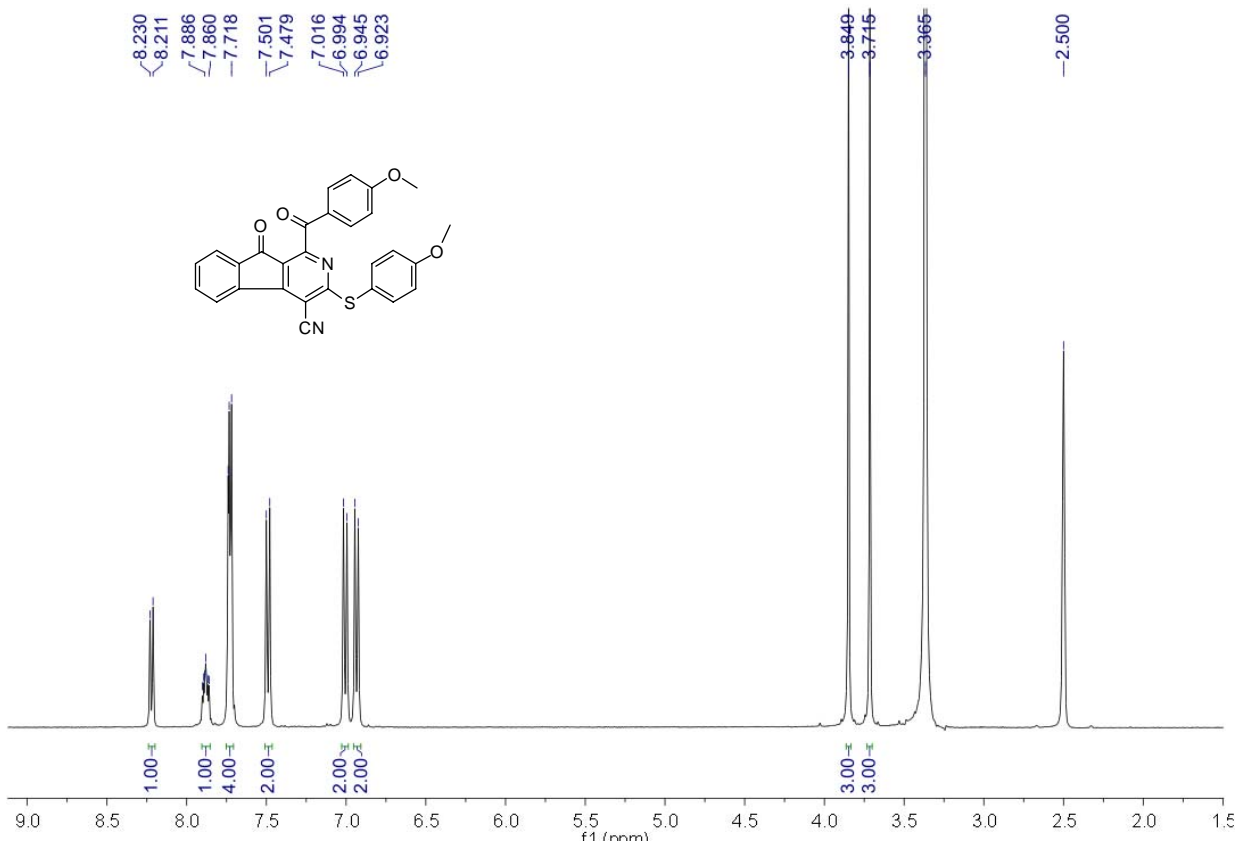

**<sup>1</sup>H NMR Spectrum of Compound 4i**



Electronic Supplementary Material (ESI) for Organic & Biomolecular Chemistry  
This journal is © The Royal Society of Chemistry 2013

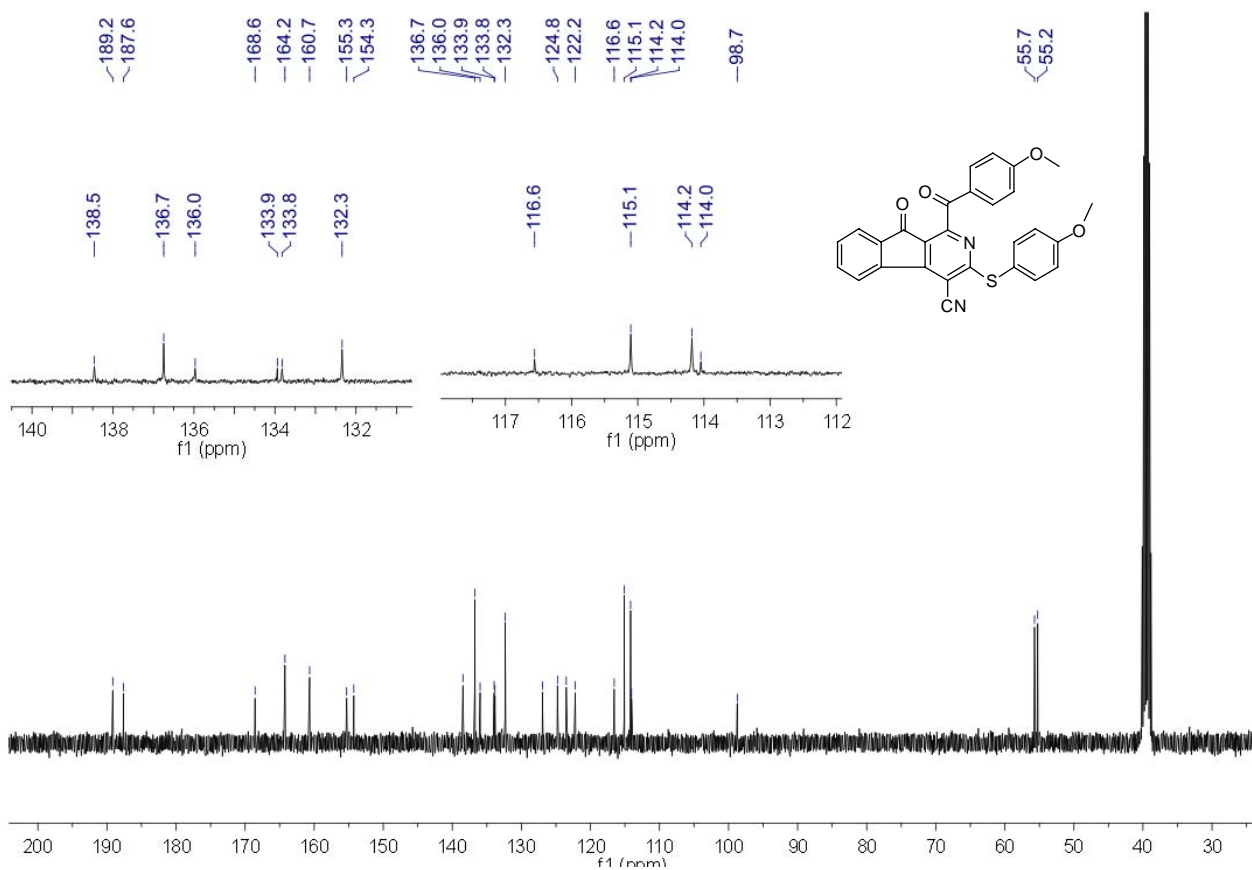

<sup>13</sup>C NMR Spectrum of Compound 4i

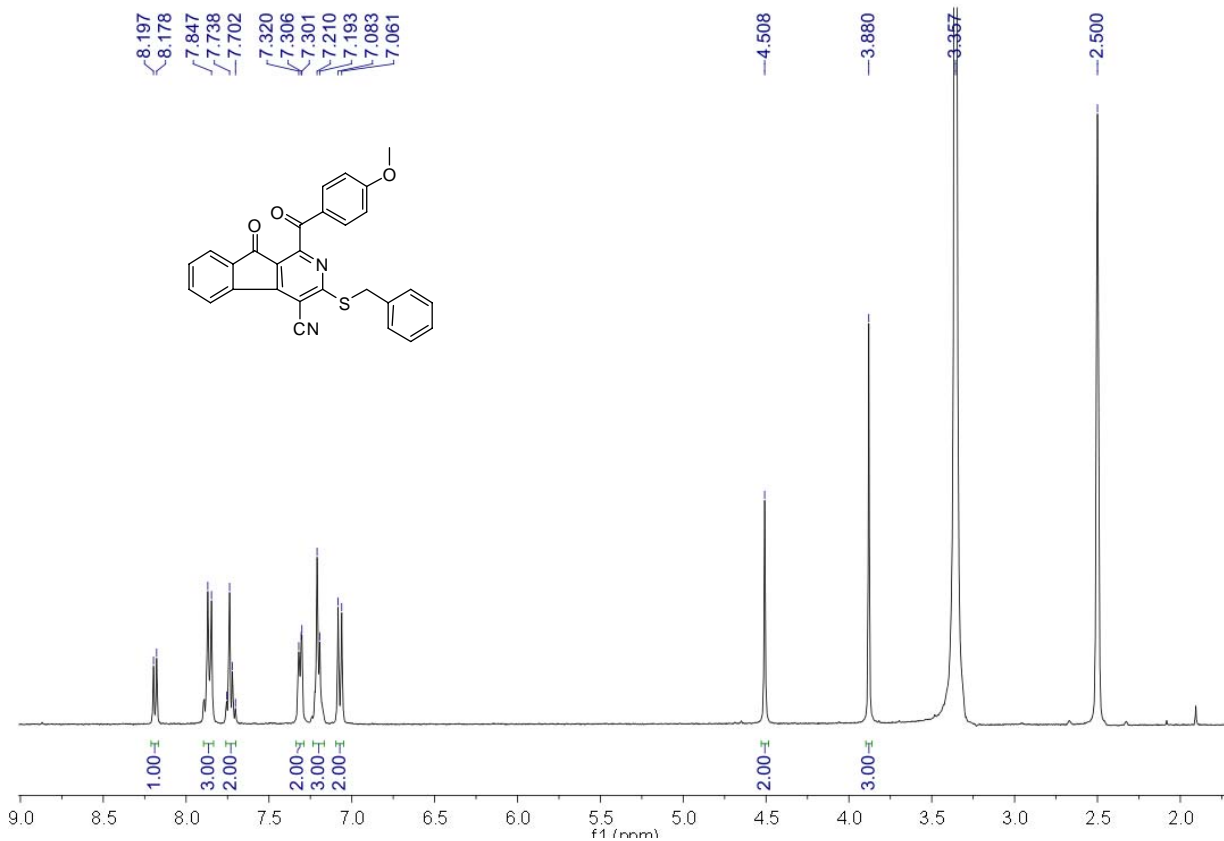

<sup>1</sup>H NMR Spectrum of Compound 4j

Electronic Supplementary Material (ESI) for Organic & Biomolecular Chemistry  
This journal is © The Royal Society of Chemistry 2013

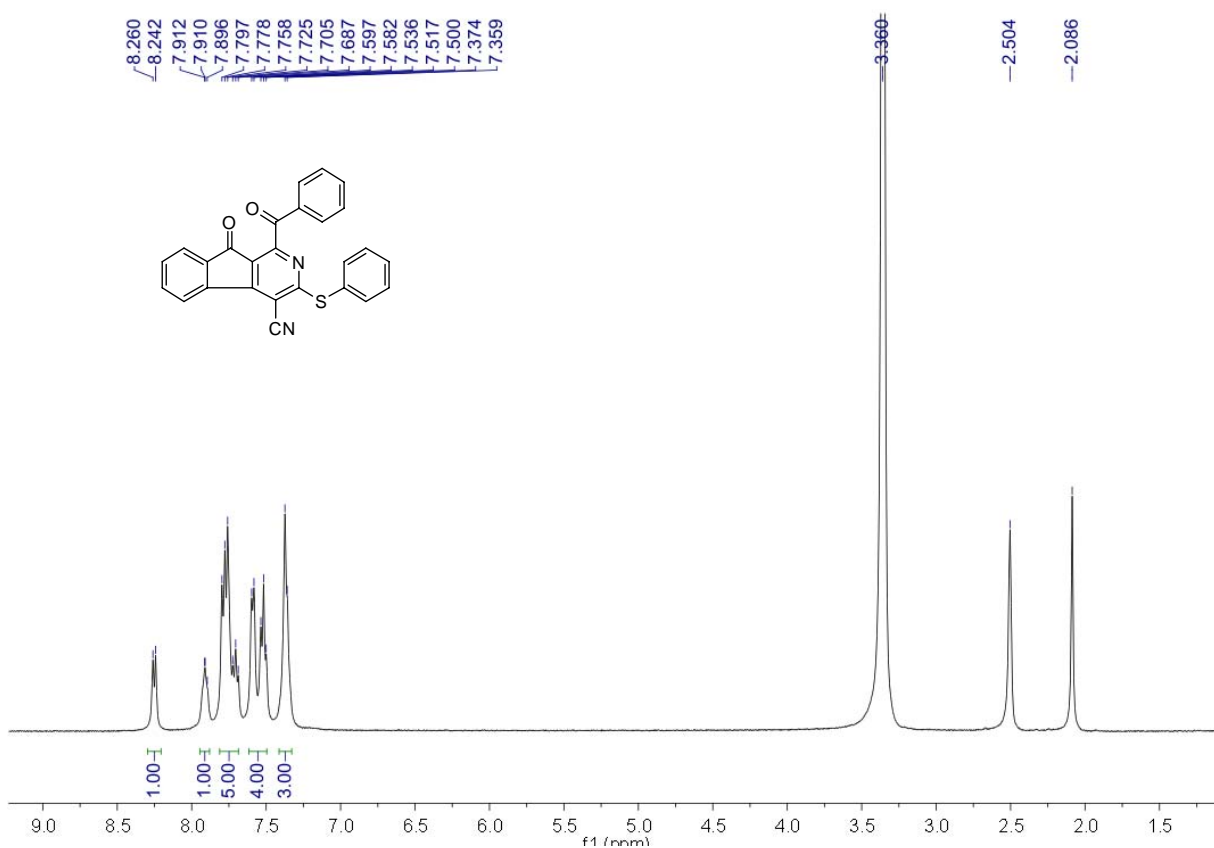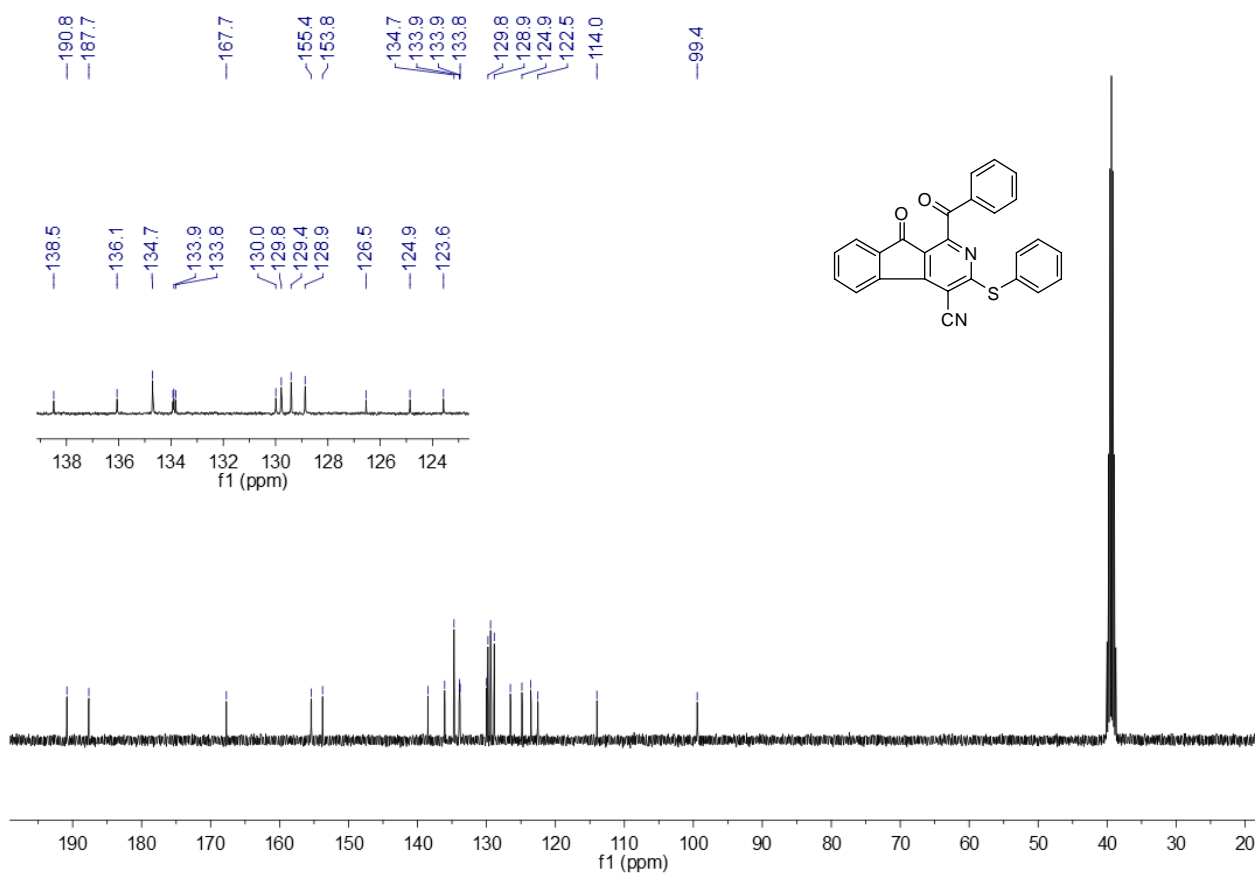

**<sup>13</sup>C NMR Spectrum of Compound 4k**

Electronic Supplementary Material (ESI) for Organic & Biomolecular Chemistry  
This journal is © The Royal Society of Chemistry 2013

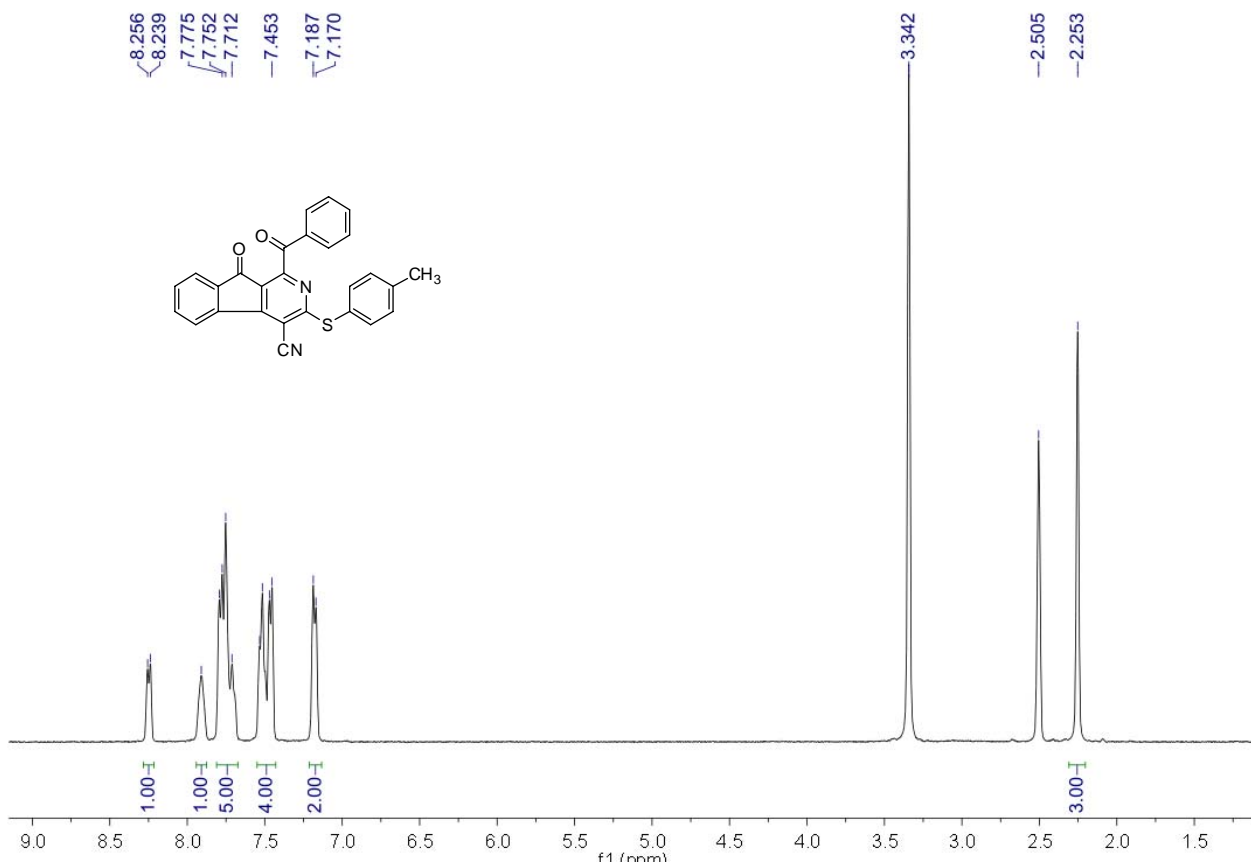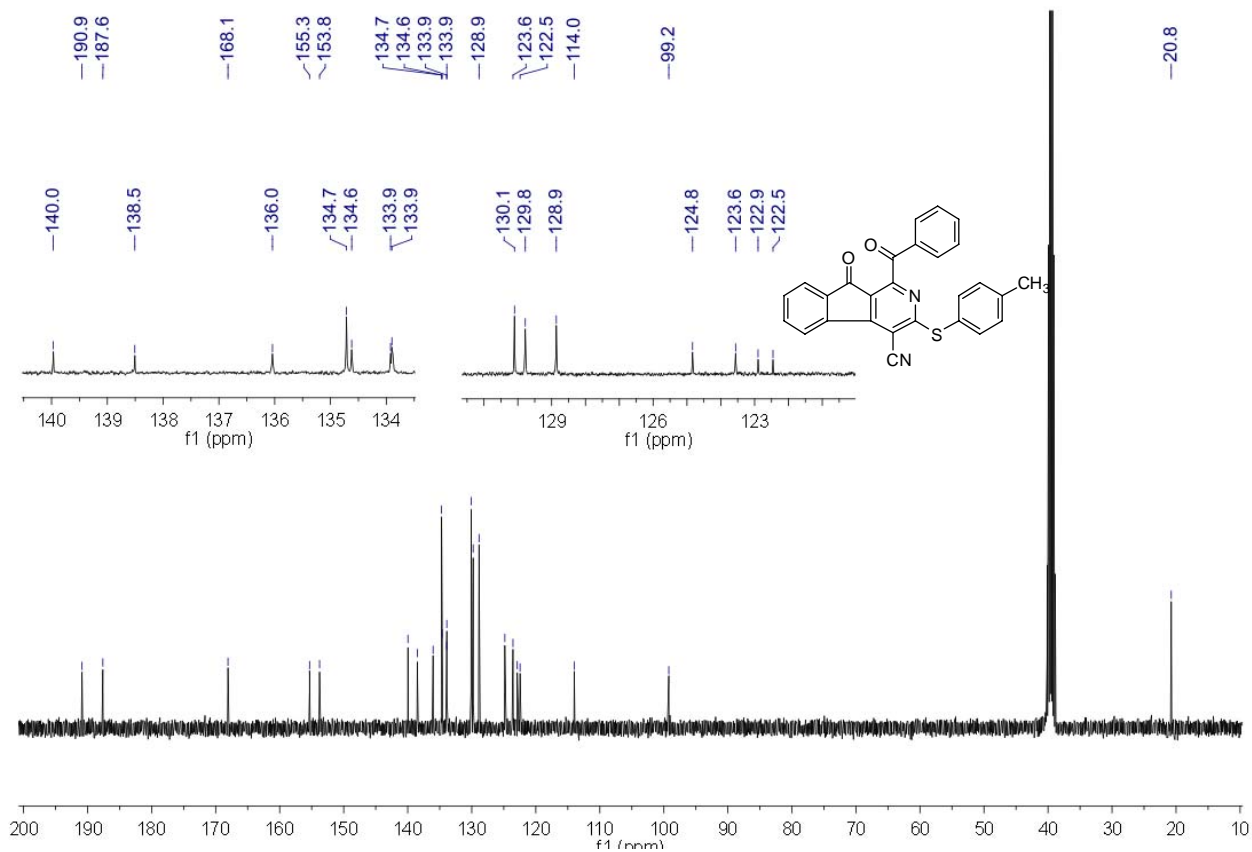

Electronic Supplementary Material (ESI) for Organic & Biomolecular Chemistry  
This journal is © The Royal Society of Chemistry 2013

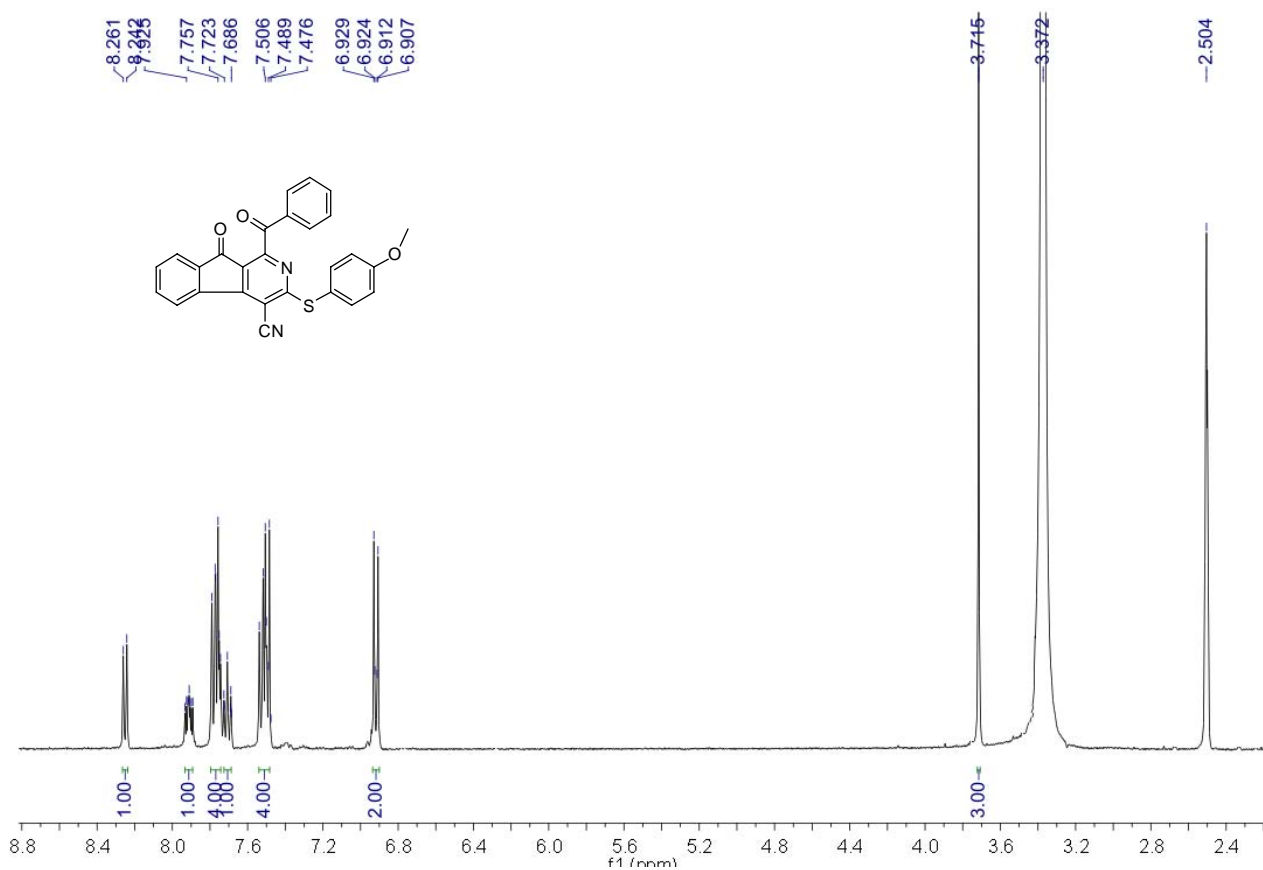

<sup>1</sup>H NMR Spectrum of Compound 4m

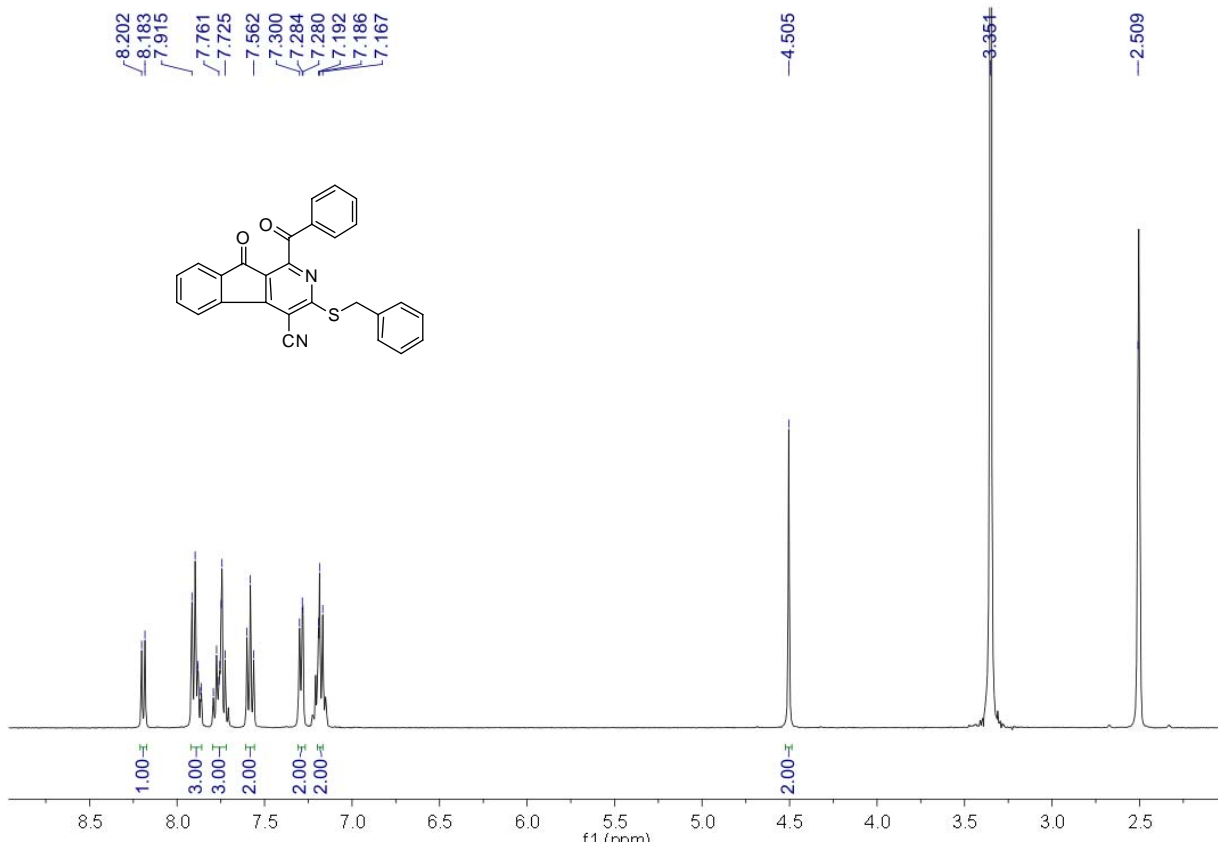

<sup>1</sup>H NMR Spectrum of Compound 4n

Electronic Supplementary Material (ESI) for Organic & Biomolecular Chemistry  
This journal is © The Royal Society of Chemistry 2013

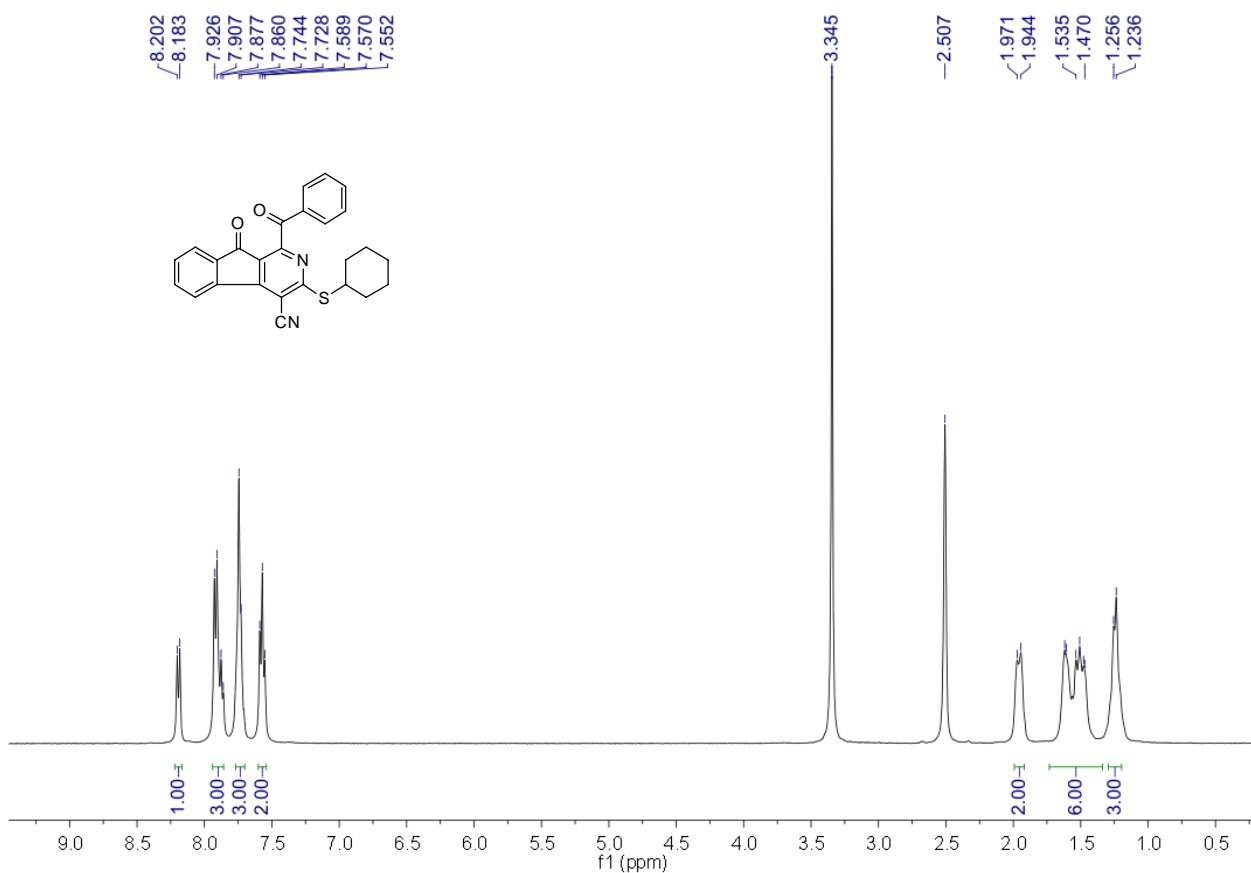

**<sup>1</sup>H NMR Spectrum of Compound 4o**

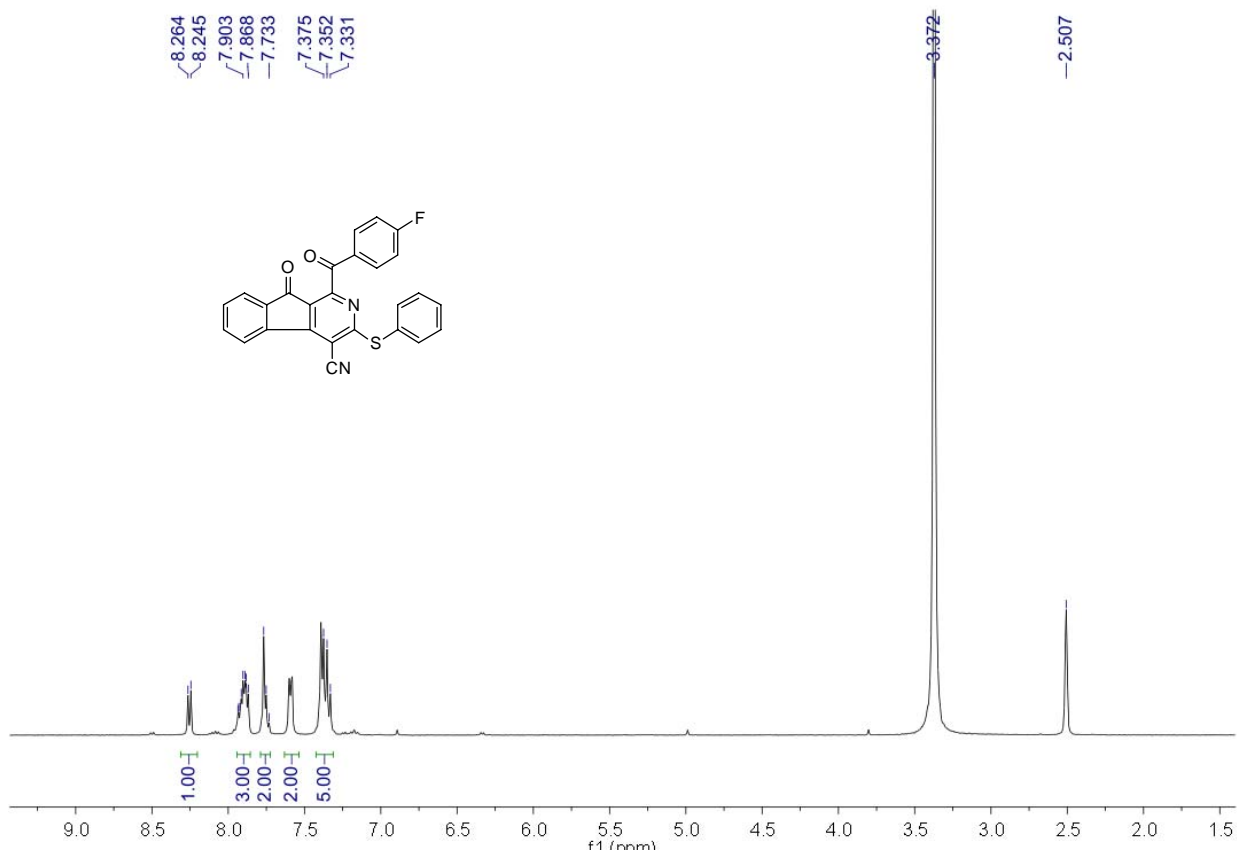

**<sup>1</sup>H NMR Spectrum of Compound 4p**

Electronic Supplementary Material (ESI) for Organic & Biomolecular Chemistry  
This journal is © The Royal Society of Chemistry 2013

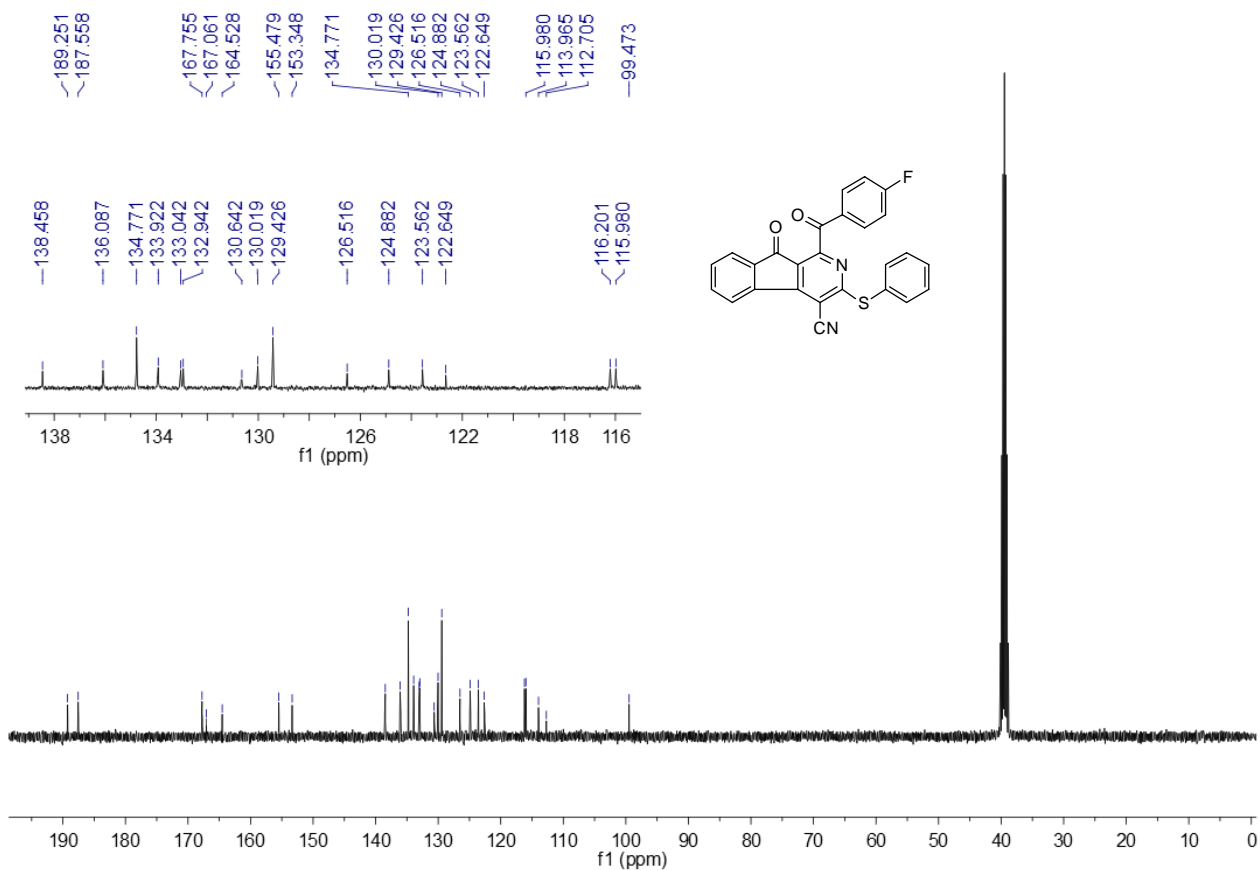

**<sup>13</sup>C NMR Spectrum of Compound 4p**

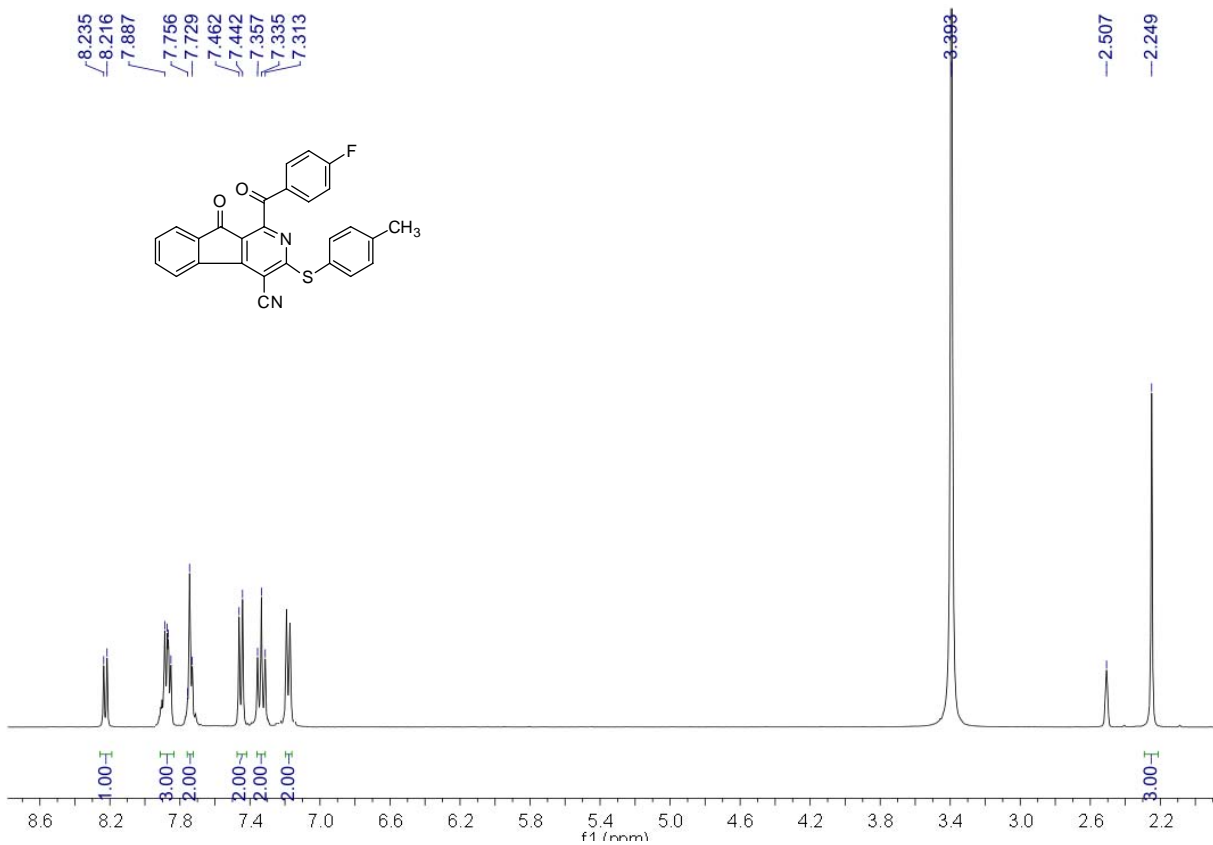

**<sup>1</sup>H NMR Spectrum of Compound 4q**

Electronic Supplementary Material (ESI) for Organic & Biomolecular Chemistry  
This journal is © The Royal Society of Chemistry 2013

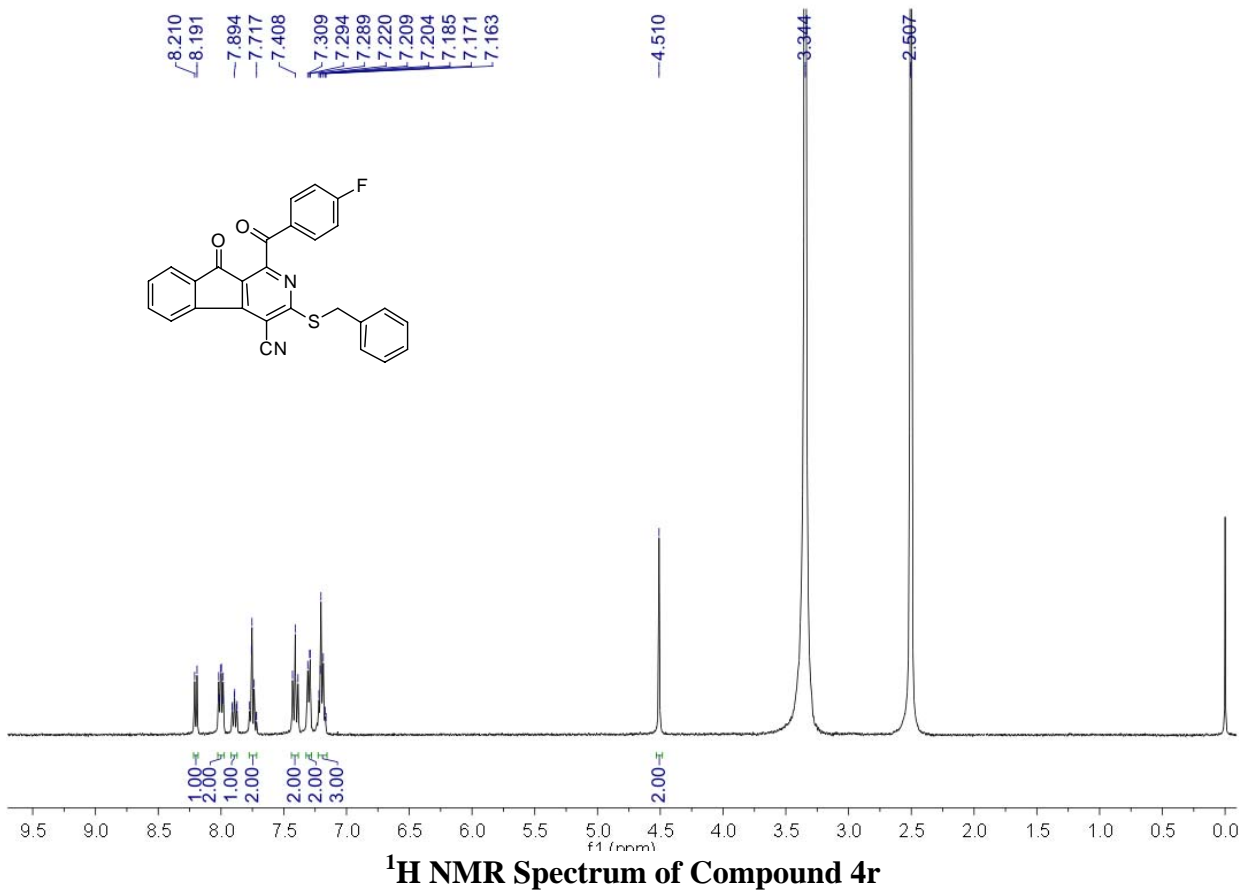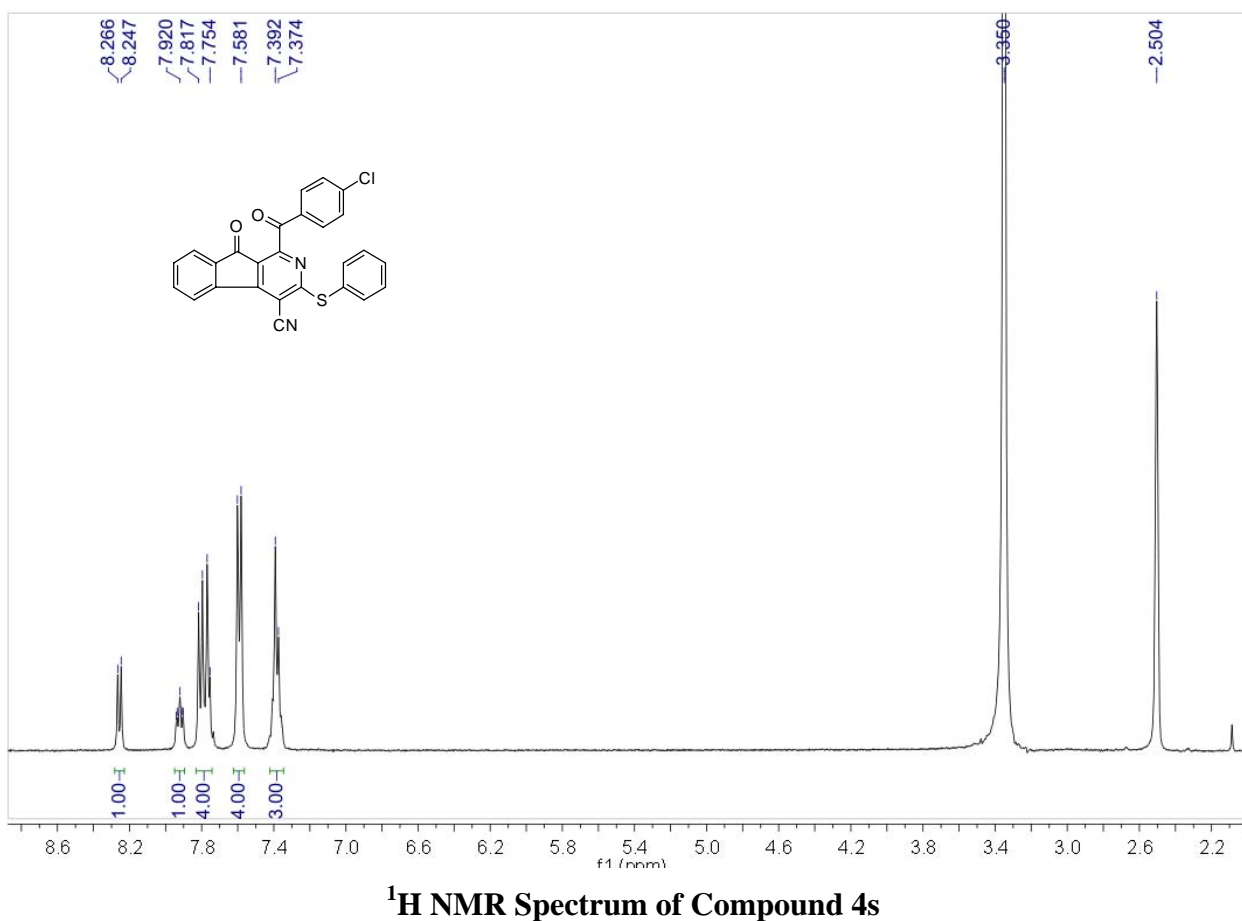

Electronic Supplementary Material (ESI) for Organic & Biomolecular Chemistry  
This journal is © The Royal Society of Chemistry 2013

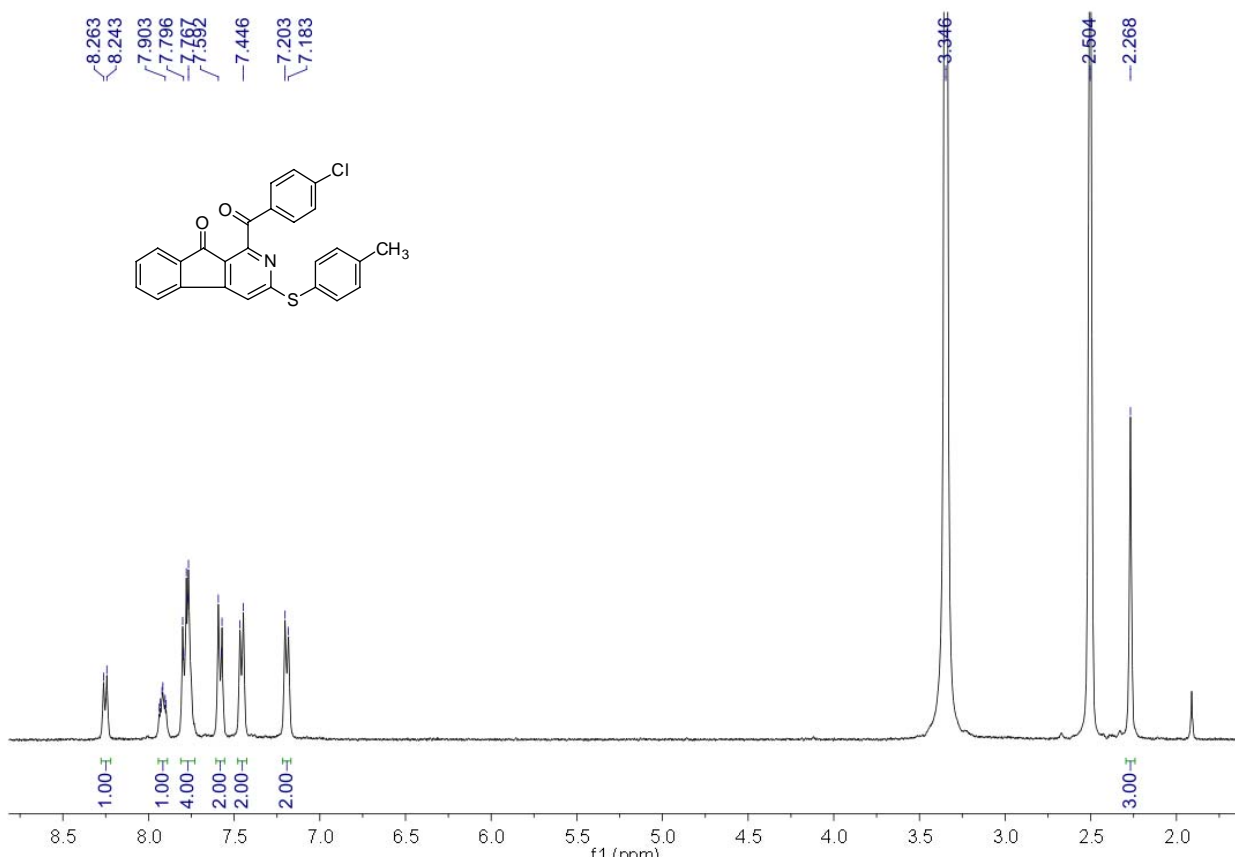

**<sup>1</sup>H NMR Spectrum of Compound 4t**

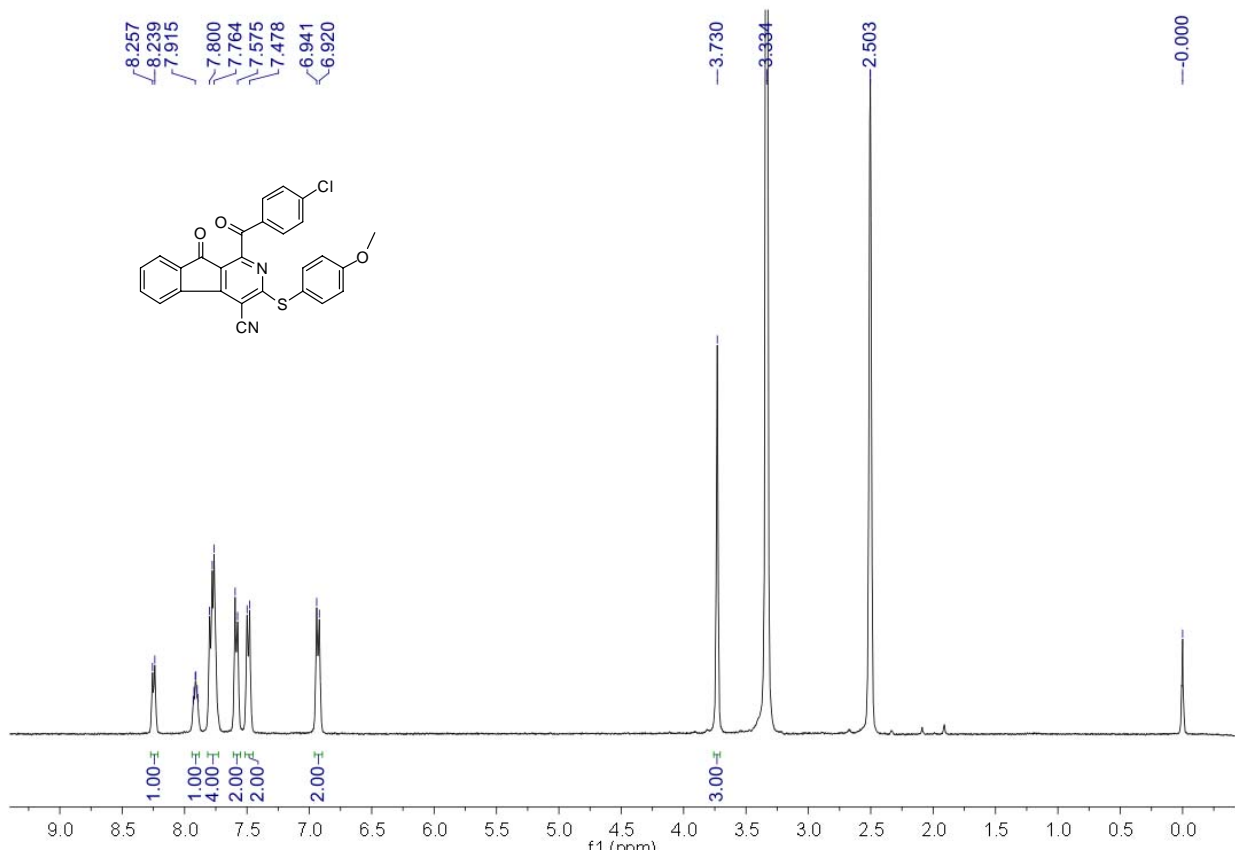

**<sup>1</sup>H NMR Spectrum of Compound 4u**



Electronic Supplementary Material (ESI) for Organic & Biomolecular Chemistry  
This journal is © The Royal Society of Chemistry 2013

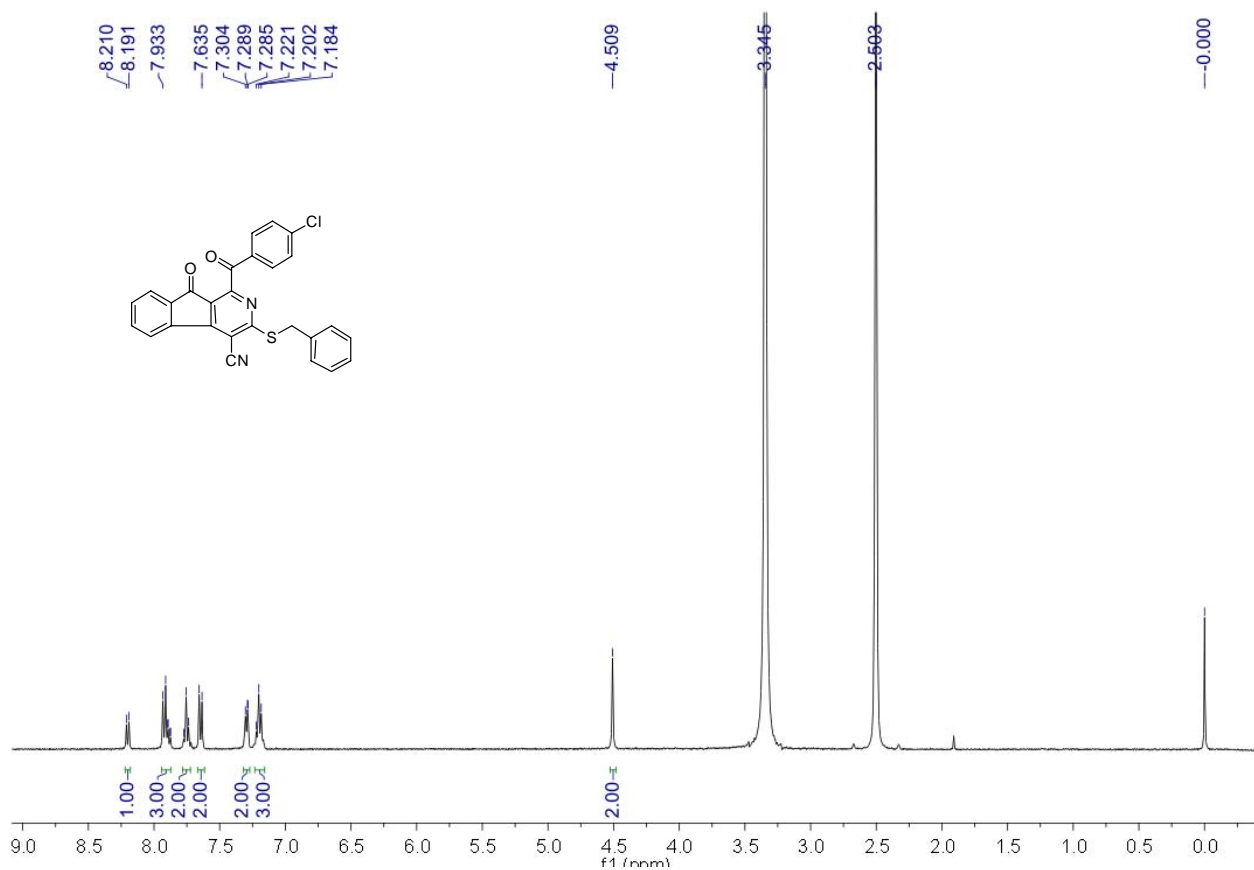

**<sup>1</sup>H NMR Spectrum of Compound 4v**

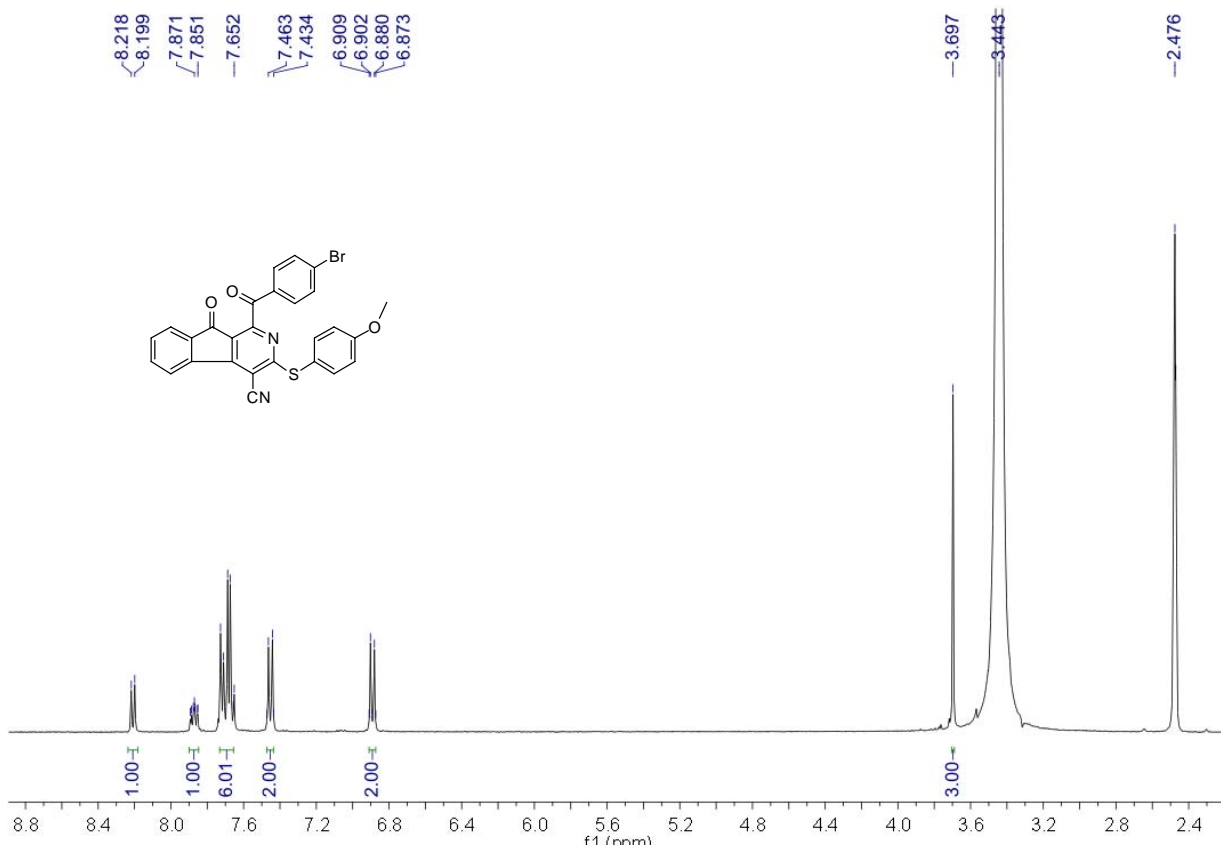

**<sup>1</sup>H NMR Spectrum of Compound 4w**
